# Supplementary material
Source: PubMed Central journal article supplement (PMC8361462)
Supplement: advancesADV2021004609-suppl1.pdf [file advancesADV2021004609-suppl1.pdf]

# Identification of the transcription factor MAZ as a regulator of erythropoiesis

Darya Deen<sup>1</sup>, Falk Butter<sup>2</sup>, Deborah E. Daniels<sup>3</sup>, Ivan Ferrer-Vicens<sup>3</sup>, Daniel C. J. Ferguson<sup>3</sup>, Michelle L. Holland<sup>4</sup>, Vasiliki Samara<sup>5</sup>, Jacqueline A. Sloane-Stanley<sup>5</sup>, Helena Ayyub<sup>5</sup>, Matthias Mann<sup>6</sup>, Jan Frayne<sup>3</sup>, David Garrick<sup>5,7\*</sup> and Douglas Vernimmen<sup>1\*</sup>

<sup>1</sup> The Roslin Institute and Royal (Dick) School of Veterinary Studies, University of Edinburgh, Easter Bush, Midlothian EH25 9RG, United Kingdom.

<sup>2</sup> Institute of Molecular Biology (IMB), 55128 Mainz, Germany

<sup>3</sup> School of Biochemistry, University of Bristol, Bristol, UK.

<sup>4</sup> Department of Medical and Molecular Genetics, School of Basic and Medical Biosciences, King's College London, London SE1 9RT, UK

<sup>5</sup> MRC Molecular Haematology Unit, Weatherall Institute for Molecular Medicine, University of Oxford, John Radcliffe Hospital, Oxford OX3 9DS, United Kingdom.

<sup>6</sup> Department of Proteomics and Signal Transduction, Max Planck Institute of Biochemistry, 82152 Martinsried, Germany.

<sup>7</sup> Current address : INSERM U976 Équipe 5, Institut de Recherche Saint Louis, Université de Paris, 75010 Paris, France.

\* These authors contributed equally

Correspondence:

[david.garrick@inserm.fr](mailto:david.garrick@inserm.fr), [douglas.vernimmen@roslin.ed.ac.uk](mailto:douglas.vernimmen@roslin.ed.ac.uk)

## Supplemental Methods

### ChIP-Seq analysis

**Alignment.** Reads were aligned using the hisat2 aligner <sup>1</sup> version 2.0.3 with the --no-spliced-alignment option, but otherwise default parameters, to a splicing-unaware index of the human GRCh38 genome.

**The strength of enrichment in the IP** was assessed plotting “fingerprints” using deepTools <sup>2</sup> and by calculating normalized strand cross-correlation coefficient (NSC) and relative strand cross-correlation coefficient (RSC) metrics using Phantompeakqualtools <sup>3</sup>.

**Normalisation of the ChIP-Seq signal.** Reads of the ChIP-Seq samples were first normalised to the input and then scaled to 1x sequencing depth using deepTools v. 3.1.3 <sup>4</sup>.

**Peak calling.** Peak calling was performed using MACS2 2.1.1 with the minimum FDR (q-value) cutoff of 0.01 <sup>5</sup>. The top 75% fold enriched peaks were selected for further analysis. For ENCODE datasets optimal IDR thresholded peaks provided by the ENCODE consortium have been used.

**Peak annotation** was made with UCSC RefSeq gene annotation (GRCh38 genome version) using HOMER suite 4.8 <sup>6</sup>. For these analyses we define promoters as regions located within a distance of -3000 bp upstream and 100 bp downstream of the TSS.

**Coverage analysis and ChIP heatmap plots and profiles** were performed using DeepTools suites. General genome arithmetics was performed using BEDTools v. 2.27.1 <sup>7</sup>. The set of erythroid-specific and housekeeping genes and erythroid enhancers was based on <sup>8</sup>.

**Correlation of the datasets.** A clustered heatmap of correlation coefficients of bigwig signal was computed using the Pearson method; the bam signal combined from the replicates was plotted over 10 kb bins with DeepTools.

**Defining erythroid-specific MAZ signal.** The peaks called on MAZ datasets were overlapped with the peaks from five MAZ ENCODE datasets with the minimum overlap

of 1 bp using BEDTools. The MAZ peaks without the overlap in any of the regions were assigned to “erythroid-specific peakset”.

**Motif Analysis.** To find the sequence motifs enriched in MAZ peaks, genomic sequences (from -50 bp to +50 bp around the centres of the top 500 MAZ peaks ranked on their q-values) were extracted (hg38) and used as input for MEME *de novo* motif discovery<sup>9</sup> with *E*-value cutoff 0.01 and motif size defined as 6-30 bp.

To calculate the presence of the motifs in a given peak, we used FIMO with the above defined motifs at a *p*-value threshold of  $10^{-4}$ <sup>10</sup>. Motif central enrichment analysis was performed using CentriMo<sup>11</sup> on regions from -250bp to +250 bp relative to the peak summits. The motif comparison was carried out using TomTom against JASPAR CORE 2018 database<sup>12</sup>.

Predicted PWMs were calculated as previously described<sup>13</sup> by using a linear support vector machine method to infer statistical pairwise contact energies between amino acids in the ZF domains of MAZ and SP1 and the corresponding DNA nucleotides.

**Functional analysis of genes with erythroid-specific MAZ enrichment.** g:Profiler<sup>14</sup> was employed to conduct Gene Ontology (GO) Biological Function and HP (Human Phenotype) gene annotations. Fisher's exact test was used to retrieve significantly enriched GO terms for genes marked with erythroid-specific MAZ signal. Functional categories are defined as those containing at least five genes and a minimum enrichment score of 1.3 (*p*-value < 0.05). GeneAtlas database<sup>15</sup> was used for mining MAZ variants associated with erythroid-specific traits (*p*-value <  $10^{-2}$ ); the *p*-values were corrected for multiple comparison using Benjamini-Hochberg method<sup>16</sup>.

## **Data sources, protocols and analysis.**

Sources of ChIP-seq data are shown in Suppl. Table 3.



## ADDITIONAL MATERIAL

### Supplemental Fig 1. Chromatin accessible regions around the human HBA locus

**in erythroid cells. (A)** Structure of the  $\alpha$ -globin locus. Chromosomal position (hg38 genome build) is shown above the genes. The locus consists of the embryonic  $\zeta$  gene (HBZ), the duplicated foetal/adult  $\alpha$  genes (HBA2 and HBA1) together with two flanking pseudogenes (HBM and HBQ1). The upstream, widely-expressed gene, NPRL3 is transcribed from the opposite strand to that of the HBA genes and contains the remote regulatory elements of the  $\alpha$ -globin locus (MCS -R1 to -R3) (indicated by red dots). Below is shown the ATAC-seq signal in human erythroblasts (taken from <sup>17</sup>) indicating chromatin accessible regions at the promoter and distal regulatory elements (shaded regions). **(B)** Fine-mapping of the promoter region of the HBA genes. Nuclei from EBV and K562 were exposed to the restriction enzymes *Bfa*I, *Bsr*FI, *Fok*I, *Hinf*I, *Eag*I, *Nco*I, *Mse*I and *Hind*III as indicated. DNA was subsequently purified, limit-digested with *Pst*I and analysed by Southern blot using the 3' *Hind*III/*Pst*I segment of the HBA1 gene as a probe (blue rectangle). This blot does not distinguish between the HBA2 and HBA1 genes.

### Supplemental Figure 2. Comparison of probes 11/12 and 13/14. (A)

Aligned sequences of probes 11/12 and 13/14. The predicted core MAZ-binding motif is highlighted. **(B)** Gel-shift assays showing that both probes bind the same species. The protein responsible for species (d) has higher affinity for the 13/14 probe as demonstrated by using unlabelled oligonucleotides as competitor (100-fold molar excess over radiolabelled probe). Note that irrelevant lanes have been removed between lanes 1 and 2.

### **Supplemental Figure 3. Characterisation of DNA binding of unknown protein by**

**EMSA. (A)** Increased concentration of EDTA abolished the protein/DNA complex for bands (a), (b), (c), and (d) with the probe 13/14, but not for the probe 7/8, which is bound by a non-Zinc finger protein, NFY (see Figure 1B). **(B)** A single nucleotide mutation (G->T) abolishes binding of the (d) complex to probe 13/14. The sequence of the wild type and mutant (M3) probes are shown above, with the mutated nucleotide indicated in red. EMSA were carried out using K562 nuclear extracts and either wild type or mutant probes together with unlabelled competitor oligonucleotides (100-fold molar excess) as indicated.

### **Supplemental Figure 4. Dynamics of MAZ recruitment to the HBA genes during**

**erythroid differentiation. (A)** Diagram representing the expression of the transferrin receptor (CD71) and glycophorin A (GPA) during the second phase of *ex vivo* erythroblast differentiation cultures. **(B)** Flow cytometry analysis of CD71 and GPA during Phase II of a representative primary erythroblast differentiation culture. Cells initially acquire expression of CD71 alone (d6) before becoming double positive for both CD71 and GPA (d9-12). At later stages in culture, expression of CD71 decreases (d15). **(C)** Quantitation of flow cytometry staining as demonstrated in (B). Shown is the mean and standard deviation from two independent differentiation cultures. **(D)** Real-time RT-PCR analysis of expression of  $\alpha$ - (HBA2) and  $\beta$ - (HBB) globin at the indicated time points during Phase II of primary erythroid differentiation cultures. Expression (relative to GAPDH) shows the mean and range from two independent differentiation cultures. **(E)** ChIP-qPCR analysis of MAZ binding at the  $\alpha$ -globin genes at the indicated time points during Phase II of primary erythroid differentiation cultures. The y axis represents enrichment over the input DNA, normalised to a control sequence in the human 18S gene. The x axis indicates the Taqman probes used. The positions of

probes at the HBA Promoter/Exon1 and HBA Ex2, and probe 82 (used as a negative control) are indicated in Figure 2D. The promoter of the MYC gene, which has been previously shown to be bound by MAZ<sup>18</sup> was used as a positive control for the ChIP.

**Supplemental Figure 5 (A)** Photomicrographs of *ex vivo* erythroid differentiation culture of untransduced cells at the timepoints indicated. **(B)** *Ex vivo* differentiation cultures of cells transduced with the scrambled shRNA or the MAZ-targeting shRNA 699 or 703 at day 15 of culture. The MAZ shRNA cultures displayed an increase in the proportion of early stage progenitor BFU-E cells (small cells with very high nuclear:cytoplasmic ratio) (black arrows). Scale bars (20  $\mu$ m). Images were taken using an Olympus CX43 microscope mounted with Olympus SC50 camera. Cells stained with Leishman's Eosin-Methylene blue solution (Leishman's stain; VWR) **(C)** Effect of MAZ knockdown using shRNA 699 and 703 in K562 cells measured by real-time RT-PCR. Expression of MAZ (left panel) relative to the PABPC1 gene is normalized to the mean value observed with scramble shRNA. The expression of HBA relative to HBG (middle panel) or HBE (right panel) is normalised to the ratio observed with scrambled shRNA (SCR). Data shows average of two independent experiments with 3 technical repeats of each.

**Supplemental Figure 6. Expression of MAZ in human and mouse haematopoietic populations. (A)** Expression of MAZ across the normal mouse (left) and human (right) haematopoietic system. In both mouse and human haematopoietic systems, MAZ is highest expressed in multipotent progenitors, and in the erythroid lineage. The immunophenotype of the populations shown are as follows : MOUSE (1) Long Term Haematopoietic Stem Cell (Lin<sup>-</sup>, ckit<sup>+</sup>, Sca1<sup>+</sup>, Flk2<sup>-</sup>, CD34<sup>-</sup>); (2) Haematopoietic Stem

Cell (Lin<sup>-</sup>, ckit<sup>+</sup>, Sca1<sup>+</sup>, Flk2<sup>-</sup>, CD34<sup>+</sup>); (3) Multipotent Progenitor (Lin<sup>-</sup>, ckit<sup>+</sup>, Sca1<sup>+</sup>, Flk2<sup>+</sup>, CD34<sup>+</sup>); (4) Common Lymphoid Progenitor (Lin<sup>-</sup>, ckit<sup>+</sup>, Flk2<sup>+</sup>, Il7R<sup>+</sup>); (5) Common Myeloid Progenitor (Lin<sup>-</sup>, ckit<sup>+</sup>, Sca1<sup>-</sup>, CD34<sup>+</sup>, FcγRIII<sup>int</sup>); (6) Megakaryocytic erythroid progenitor (Lin<sup>-</sup>, ckit<sup>+</sup>, Sca1<sup>-</sup>, Flk2<sup>-</sup>, CD34<sup>-</sup>); (7), Granulocyte Monocyte Progenitor (Lin<sup>-</sup>, ckit<sup>+</sup>, Sca1<sup>-</sup>, CD34<sup>+</sup>, FcγRIII<sup>high</sup>); and corresponding HUMAN populations (1) Haematopoietic stem cell (CD133<sup>+</sup>, CD34<sup>dim</sup>); (5) Common myeloid progenitor (CD34<sup>+</sup>, CD38<sup>+</sup>, IL-3R<sup>lo</sup>, CD45RA<sup>-</sup>); (6) Megakaryocyte/ erythroid progenitor (CD34<sup>+</sup>, CD38<sup>+</sup>, IL-3R<sup>-</sup>, CD45RA<sup>-</sup>); (7) Granulocyte/monocyte progenitor (CD34<sup>+</sup>, CD38<sup>+</sup>, IL-3R<sup>lo</sup>, CD45RA<sup>+</sup>). **(B)** Normalised expression of MAZ in mature haematopoietic populations (\* p<0.05, \*\* p<0.01, \*\*\* p<0.001, \*\*\*\* p<0.0001; one-way ANOVA with Bonferroni's correction for multiple testing. For (A) and (B), data for MAZ expression (microarray probe 212064\_x\_at on Affymetrix GeneChip HT-HG\_U133A array) in human haematopoietic populations was extracted from the DMAP dataset (GSE24759<sup>19</sup>), by Bloodspot<sup>20,21</sup>. Data for Maz expression in mouse haematopoietic populations was extracted from RNAseq datasets GSE14833<sup>22</sup> and GSE6506<sup>23</sup> by Bloodspot. Population trees in (A) were generated using Bloodspot.

**Supplemental Figure 7. (A)** The binding of MAZ to its own promoter overlaps with a SNP which is associated with increased haematocrit (see Figure 3G). A second SNP is located in the last intron and is associated with small RBC volume, and a third SNP is located in the 3'UTR and is associated with familial erythrocytosis. **(B)** MAZ occupies loci coding for erythroid transcription factors GATA1 and KLF1.

**Supplemental Figure 8. MAZ ChIP-Seq quality control metrics. (A)** Fingerprint of MAZ ChIP-Seq dataset compared to input showing an enrichment of DNA fragments for MAZ. **(B)** Cross-correlation plot profile for MAZ ChIP-Seq dataset indicating the normalized strand coefficient (NSC) and the ratio between the fragment-length peak and the read-length peak (relative strand correlation, RSC) for assessing signal-to-noise ratios. **(C)** Heat map representation of MAZ ChIP-seq signal at +/- 3 kb relative to the centre of called MAZ peaks. **(D)** The average relative MAZ signal around the MAZ peaks located at the promoters, intergenic and genic regions.

**Supplemental Figure 9. Mutation analysis of binding of MAZ to the 13/14 probe.** EMSA assays were carried out with the indicated probes and K562 nuclear extract. The consensus G<sub>3</sub>CG<sub>4</sub> MAZ-binding motif is shown in bold. Variation from the wild type 13/14 probe in mutant probes is indicated in red. Variation from the G<sub>3</sub>CG<sub>4</sub> consensus in probe 11/12 is indicated in blue. The retarded species caused by MAZ (species (d)) is indicated by an arrow.

**Supplemental Figure 10. MAZ-like position weight matrices. (A).** The alignment of the MAZ position weight matrix derived from our ChIP-seq dataset, to significantly related ( $E\_value < 0.01$ ) binding profiles of transcription factors present in the JASPAR database. Also shown is the alignment with the PWM of KLF3. **(B).** Expression of the

corresponding TFs and MAZ during erythroid differentiation as measured by RNAseq. The y axis represents FPKM and the x-axis indicates days of differentiation. Note KLF5 is not expressed in erythroid cells. **(C)**. Comparison of experimentally-determined PWMs (left panel), with matrices predicted based on inferred contact energies for the C2H2-ZF domains of each protein (right panel).

**Supplemental Figure 11. Expression of MAZ, SP1, Sp3 and KLF3 in some of the cell lines used in this study.** RNAseq expression data were extracted from [proteomicsatlas.org](http://proteomicsatlas.org). The y axis shows the normalized expression values.

**Supplemental Table 1. Results of affinity-purification screen.** Proteins detected in both WT replicates and showing enriched binding (nom significance < 0.05) to the 13/14 WT probe relative to the 13/14 M3 mutant probe. Shown is the gene name, description and unique identifiers (Uniprot, VEGA, Ensembl and Refseq). Pfam annotations (protein domains) were mapped to the protein entries. MS/MS count indicates the number of spectra recorded for all peptides of the protein group binding to the WT and mutant probes (from two independent replicate experiments). Ratio for enrichment between the two oligonucleotide baits is calculated based on protein intensity and significance from MaxQuant analysis <sup>24</sup>.

**Supplemental Table 2.** Erythroid-related traits used to search in the GeneATLAS database for MAZ variants.

**Supplemental Table 3:** Datasets used in the study

**Supplemental Table 4.** Tissue specific MAZ peaks in ENCODE human cell lines and human primary erythroid cells.

**Supplemental Table 5.** Location of MAZ peaks within genomic loci associated with erythroid traits and erythropoiesis.

**Supplemental Table 6.** Sequences of oligonucleotides used in this study

## REFERENCES

1. Kim D, Langmead B, Salzberg SL. HISAT: a fast spliced aligner with low memory requirements. *Nat Methods*. 2015;12(4):357-360.
2. Diaz A, Park K, Lim DA, Song JS. Normalization, bias correction, and peak calling for ChIP-seq. *Stat Appl Genet Mol Biol*. 2012;11(3):Article 9.
3. Landt SG, Marinov GK, Kundaje A, et al. ChIP-seq guidelines and practices of the ENCODE and modENCODE consortia. *Genome Res*. 2012;22(9):1813-1831.
4. Ramirez F, Ryan DP, Gruning B, et al. deepTools2: a next generation web server for deep-sequencing data analysis. *Nucleic Acids Res*. 2016;44(W1):W160-165.
5. Zhang Y, Liu T, Meyer CA, et al. Model-based analysis of ChIP-Seq (MACS). *Genome Biol*. 2008;9(9):R137.
6. Heinz S, Benner C, Spann N, et al. Simple combinations of lineage-determining transcription factors prime cis-regulatory elements required for macrophage and B cell identities. *Mol Cell*. 2010;38(4):576-589.
7. Quinlan AR. BEDTools: The Swiss-Army Tool for Genome Feature Analysis. *Curr Protoc Bioinformatics*. 2014;47:11 12 11-34.
8. van de Lagemaat LN, Flenley M, Lynch MD, et al. CpG binding protein (CFP1) occupies open chromatin regions of active genes, including enhancers and non-CpG islands. *Epigenetics Chromatin*. 2018;11(1):59.
9. Bailey TL, Johnson J, Grant CE, Noble WS. The MEME Suite. *Nucleic Acids Res*. 2015;43(W1):W39-49.
10. Grant CE, Bailey TL, Noble WS. FIMO: scanning for occurrences of a given motif. *Bioinformatics*. 2011;27(7):1017-1018.
11. Bailey TL, Machanick P. Inferring direct DNA binding from ChIP-seq. *Nucleic Acids Res*. 2012;40(17):e128.
12. Gupta S, Stamatoyannopoulos JA, Bailey TL, Noble WS. Quantifying similarity between motifs. *Genome Biol*. 2007;8(2):R24.
13. Persikov AV, Singh M. De novo prediction of DNA-binding specificities for Cys2His2 zinc finger proteins. *Nucleic Acids Res*. 2014;42(1):97-108.
14. Raudvere U, Kolberg L, Kuzmin I, et al. g:Profiler: a web server for functional enrichment analysis and conversions of gene lists (2019 update). *Nucleic Acids Res*. 2019.
15. Canela-Xandri O, Rawlik K, Tenesa A. An atlas of genetic associations in UK Biobank. *Nat Genet*. 2018;50(11):1593-1599.
16. Benjamini Y, Hochberg Y. Controlling the False Discovery Rate: A Practical and Powerful Approach to Multiple Testing. *Journal of the Royal Statistical Society Series B* 1995;57(1):12.

17. Corces MR, Buenrostro JD, Wu B, et al. Lineage-specific and single-cell chromatin accessibility charts human hematopoiesis and leukemia evolution. *Nat Genet.* 2016;48(10):1193-1203.
18. Bossone SA, Asselin C, Patel AJ, Marcu KB. MAZ, a zinc finger protein, binds to c-MYC and C2 gene sequences regulating transcriptional initiation and termination. *Proc Natl Acad Sci U S A.* 1992;89(16):7452-7456.
19. Novershtern N, Subramanian A, Lawton LN, et al. Densely interconnected transcriptional circuits control cell states in human hematopoiesis. *Cell.* 2011;144(2):296-309.
20. Bagger FO, Sasivarevic D, Sohi SH, et al. BloodSpot: a database of gene expression profiles and transcriptional programs for healthy and malignant haematopoiesis. *Nucleic Acids Res.* 2016;44(D1):D917-924.
21. Bagger FO, Kinalis S, Rapin N. BloodSpot: a database of healthy and malignant haematopoiesis updated with purified and single cell mRNA sequencing profiles. *Nucleic Acids Res.* 2019;47(D1):D881-D885.
22. Di Tullio A, Vu Manh TP, Schubert A, Castellano G, Mansson R, Graf T. CCAAT/enhancer binding protein alpha (C/EBP(alpha))-induced transdifferentiation of pre-B cells into macrophages involves no overt retrodifferentiation. *Proc Natl Acad Sci U S A.* 2011;108(41):17016-17021.
23. Chambers SM, Boles NC, Lin KY, et al. Hematopoietic fingerprints: an expression database of stem cells and their progeny. *Cell Stem Cell.* 2007;1(5):578-591.
24. Cox J, Mann M. MaxQuant enables high peptide identification rates, individualized p.p.b.-range mass accuracies and proteome-wide protein quantification. *Nat Biotechnol.* 2008;26(12):1367-1372.
25. Xu J, Shao Z, Glass K, et al. Combinatorial assembly of developmental stage-specific enhancers controls gene expression programs during human erythropoiesis. *Dev Cell.* 2012;23(4):796-811.
26. Huang J, Liu X, Li D, et al. Dynamic Control of Enhancer Repertoires Drives Lineage and Stage-Specific Transcription during Hematopoiesis. *Dev Cell.* 2016;36(1):9-23.
27. Dunham I, Kundaje A, Aldred SF, et al. An integrated encyclopedia of DNA elements in the human genome. *Nature.* 2012;489(7414):57-74.



**A**

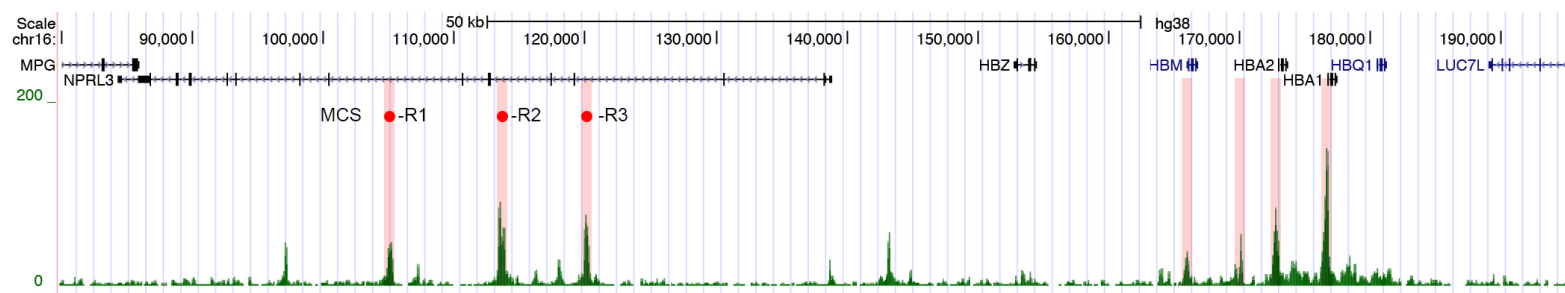

**B**

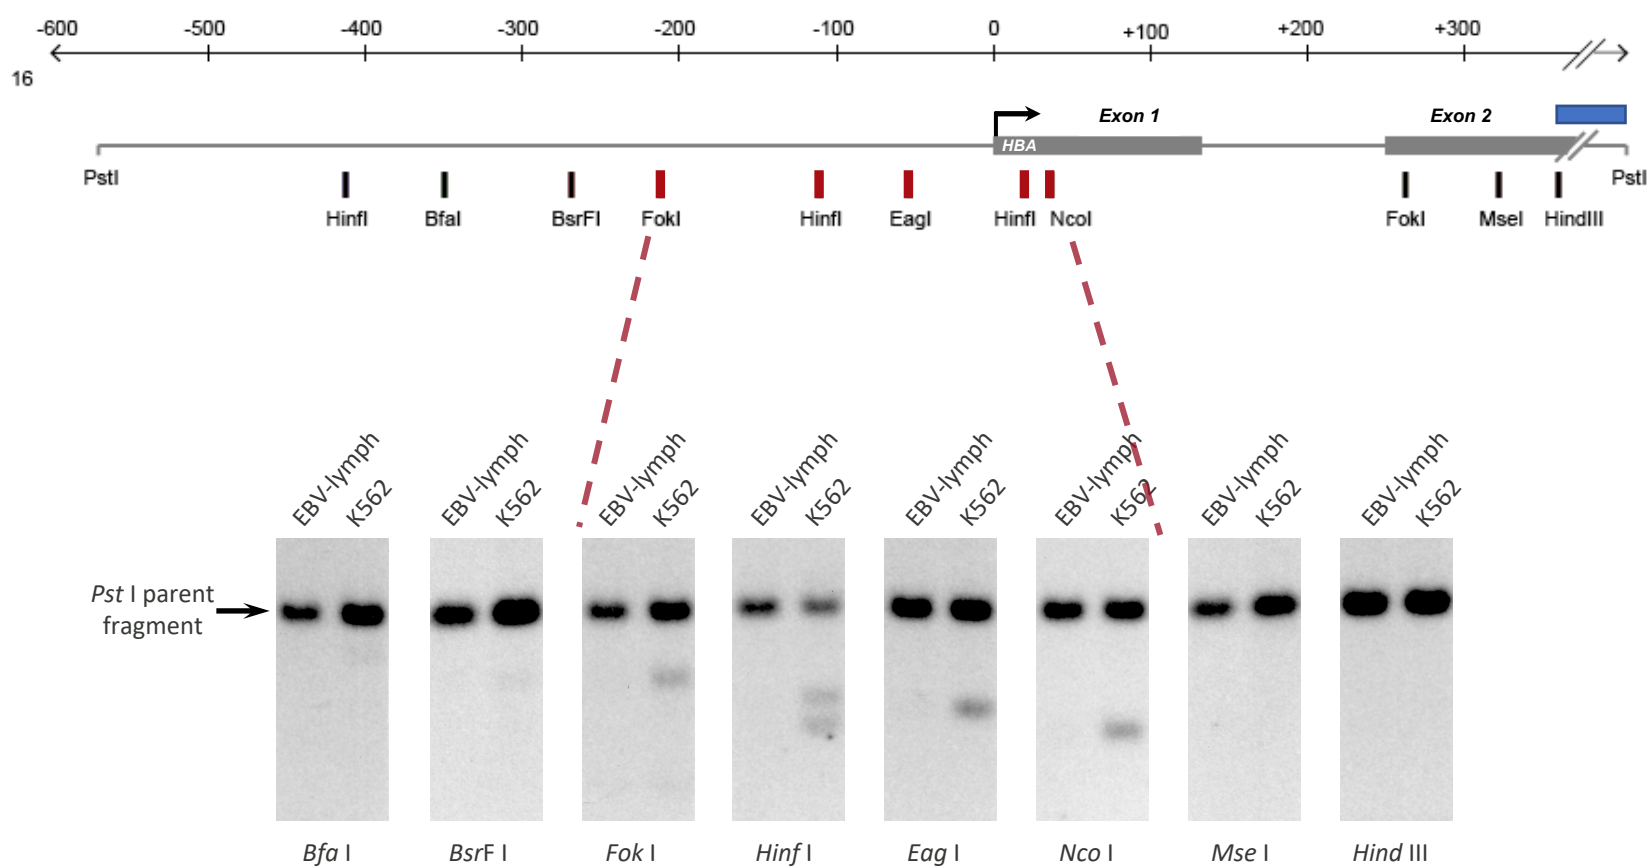



**A**

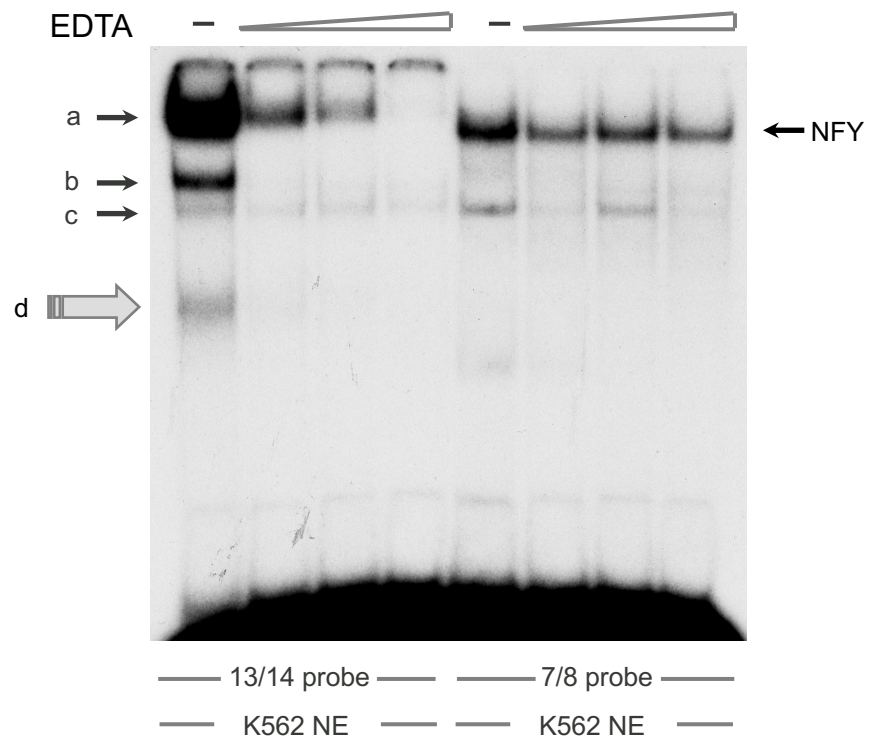

**B**

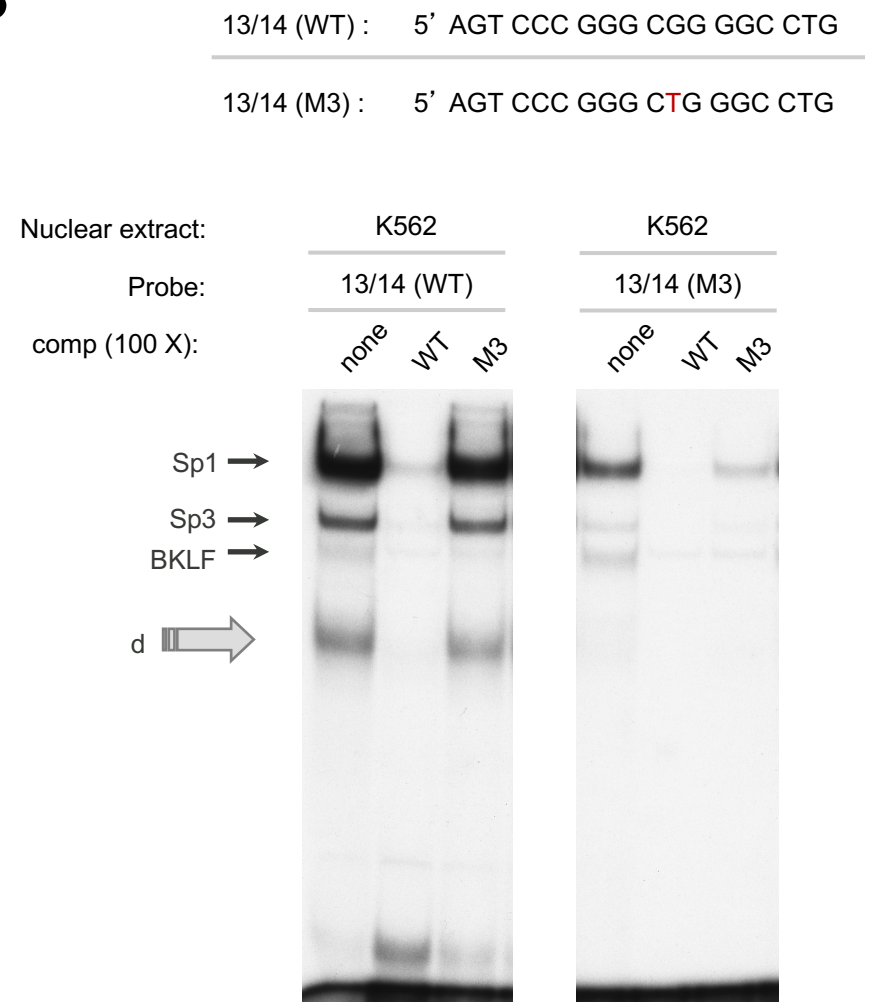

A

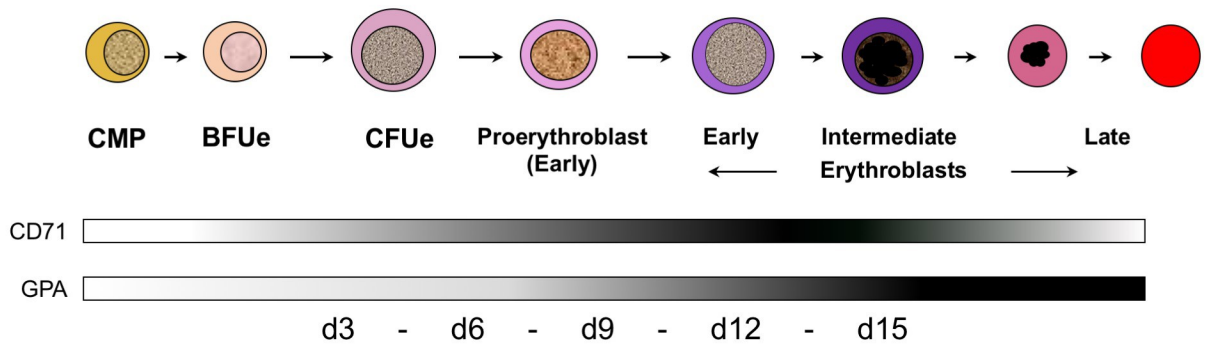

B

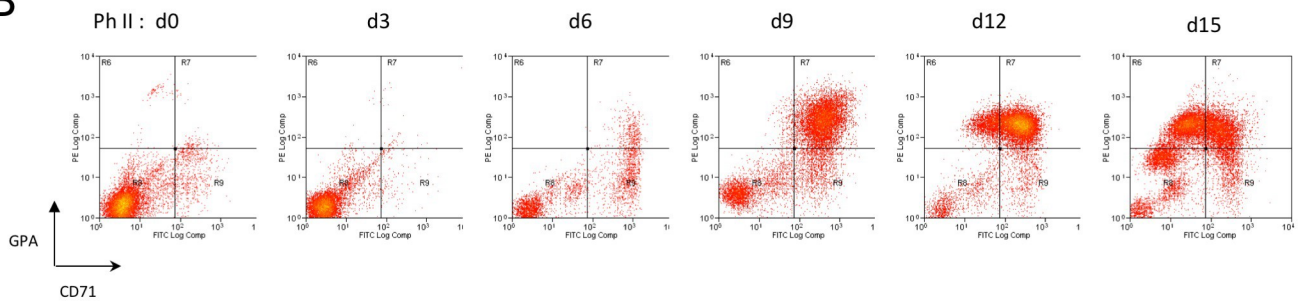

C

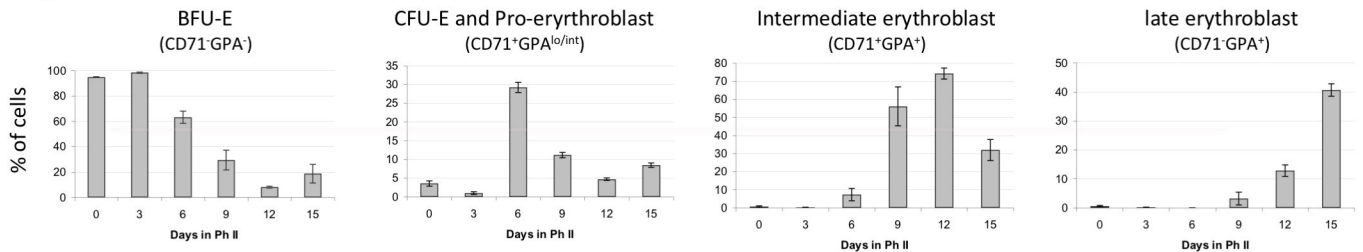

D

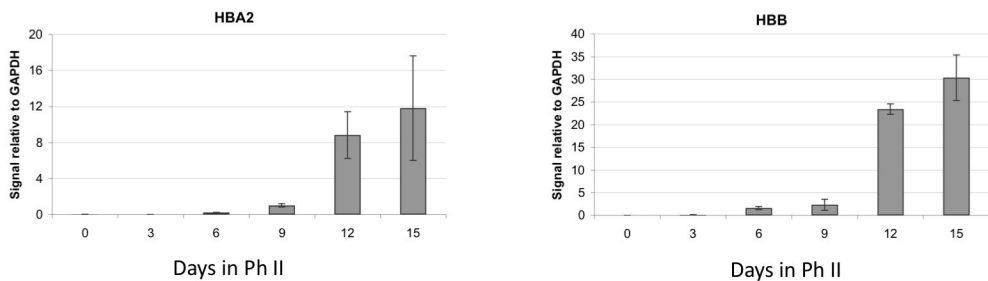

E

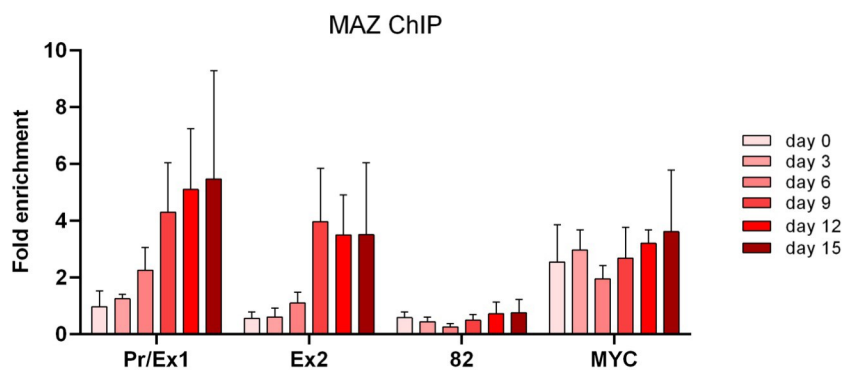



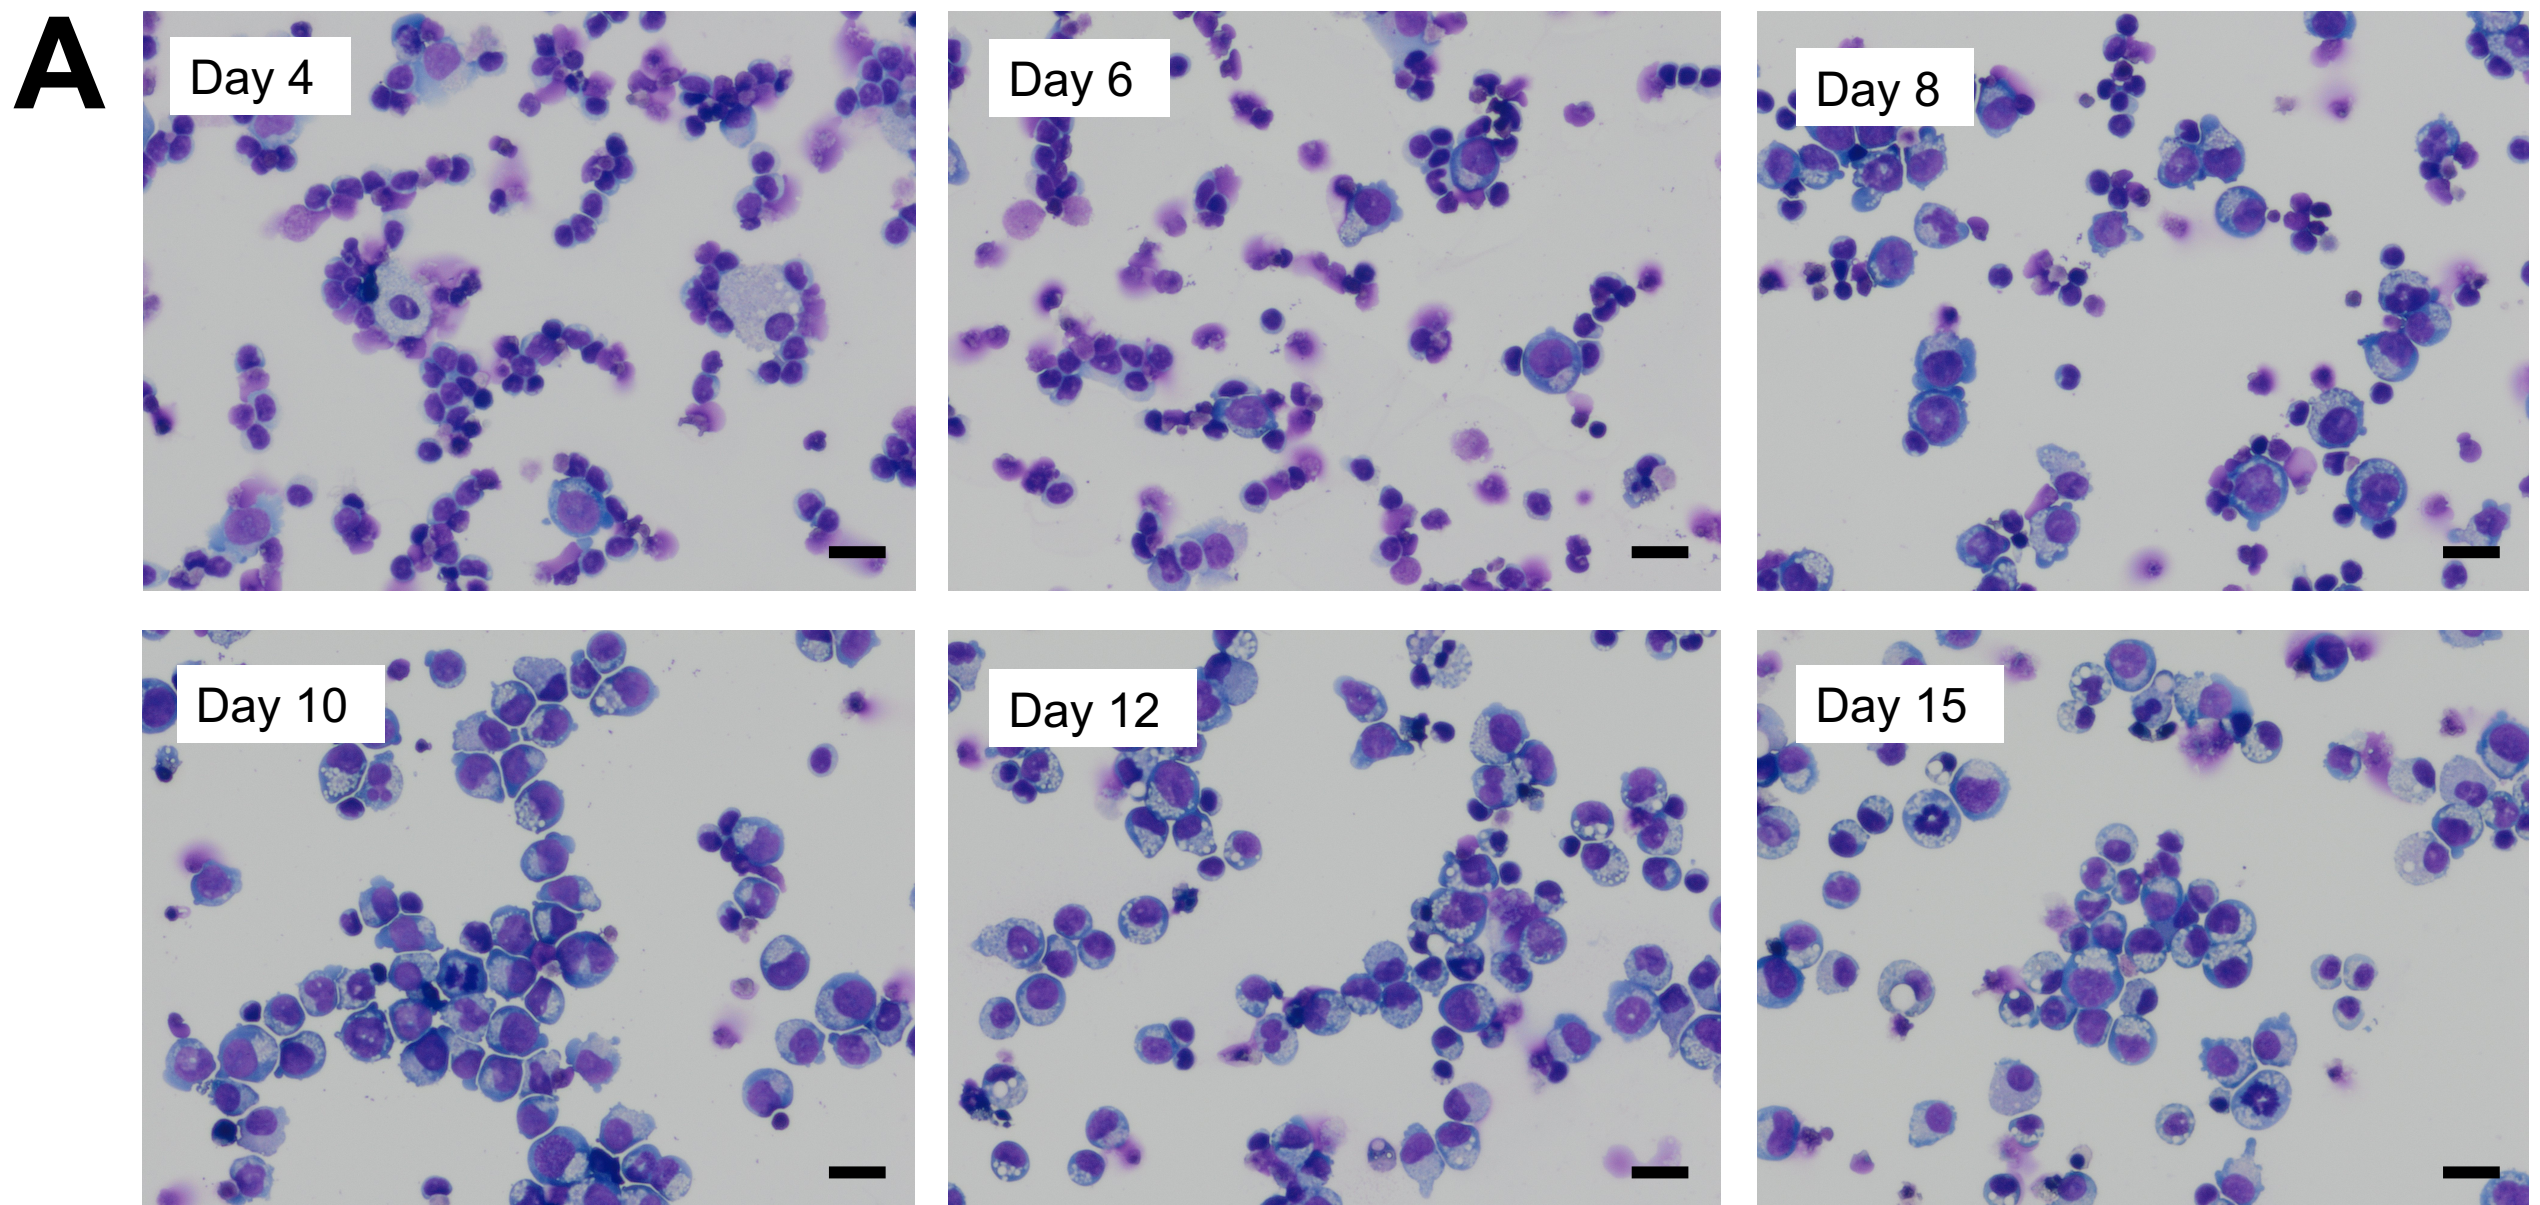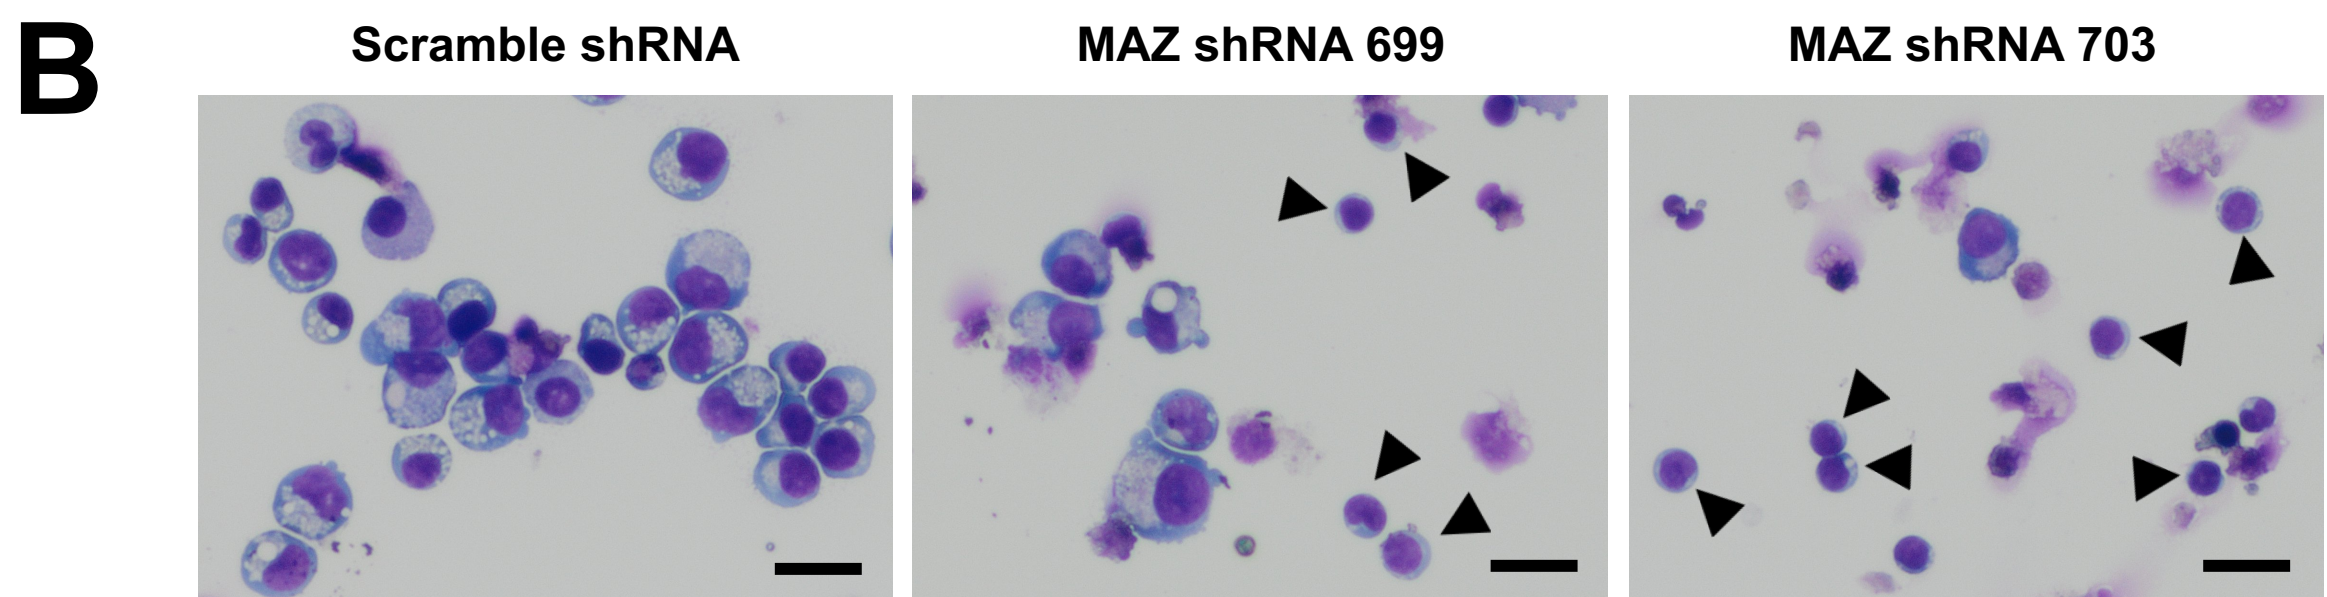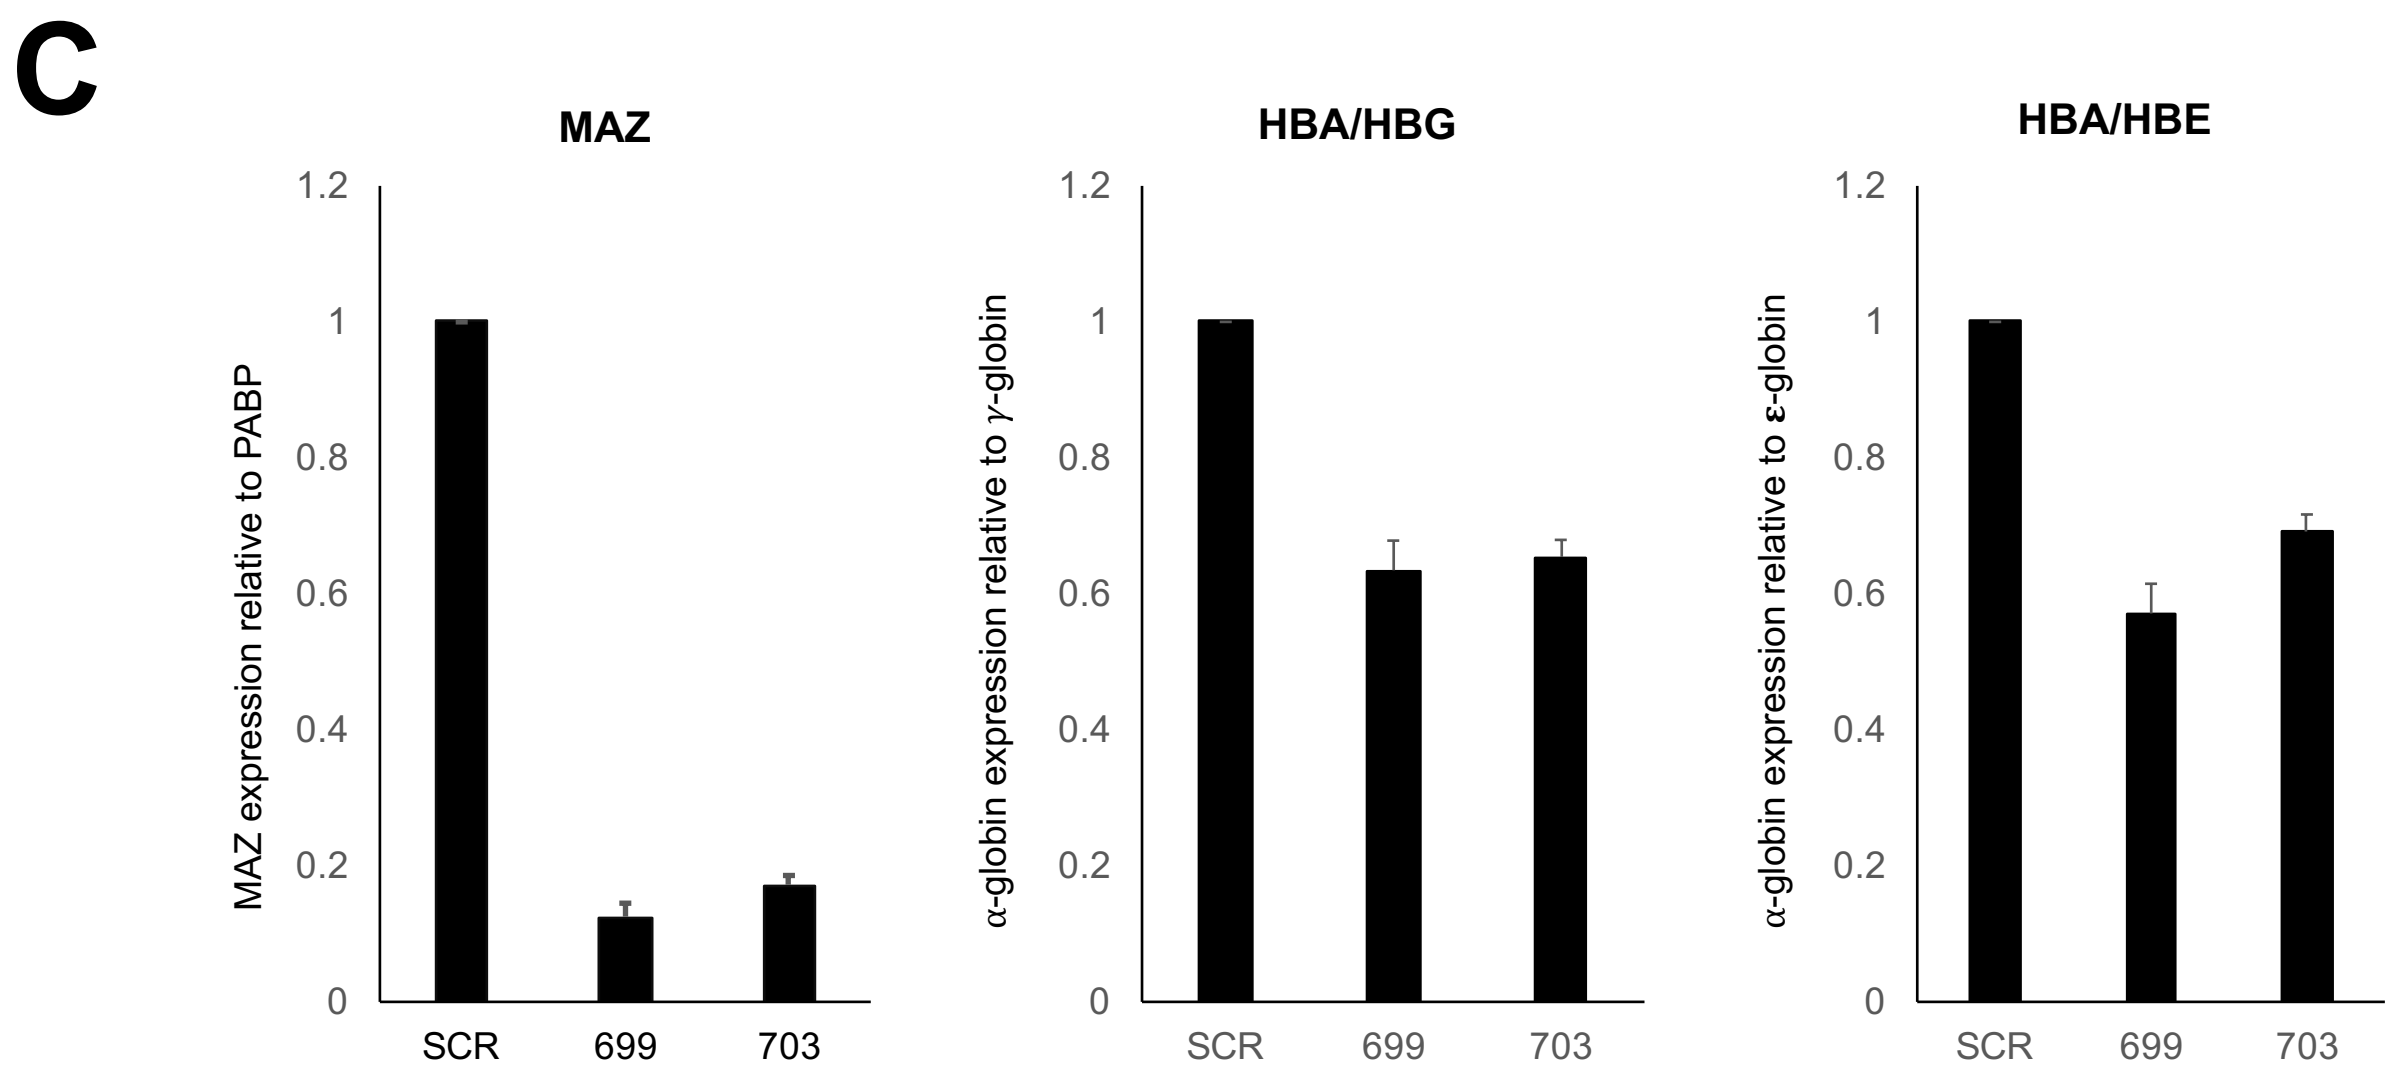



**A**

Mouse

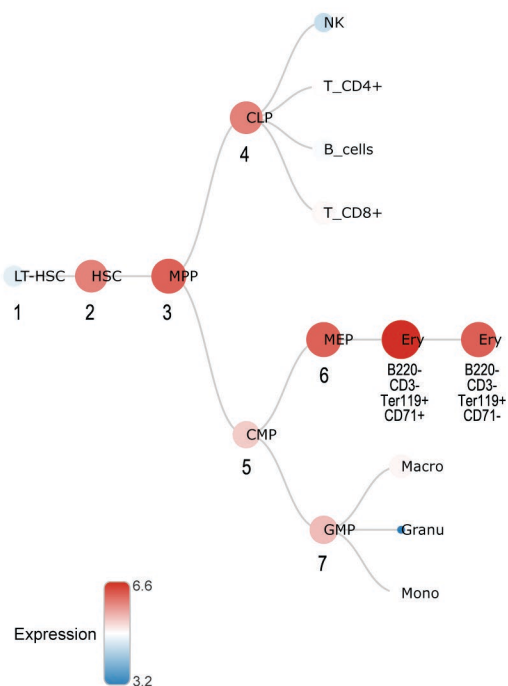

Human

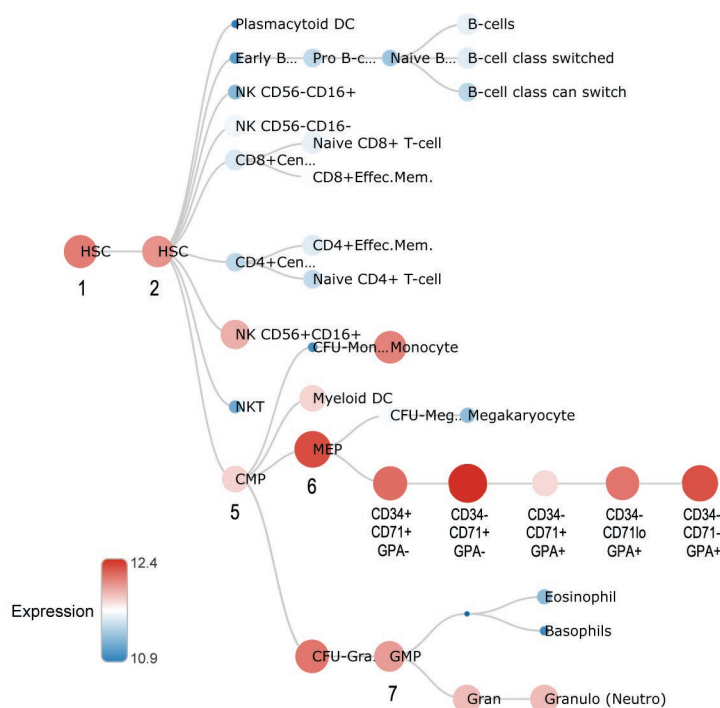**B**

Mouse

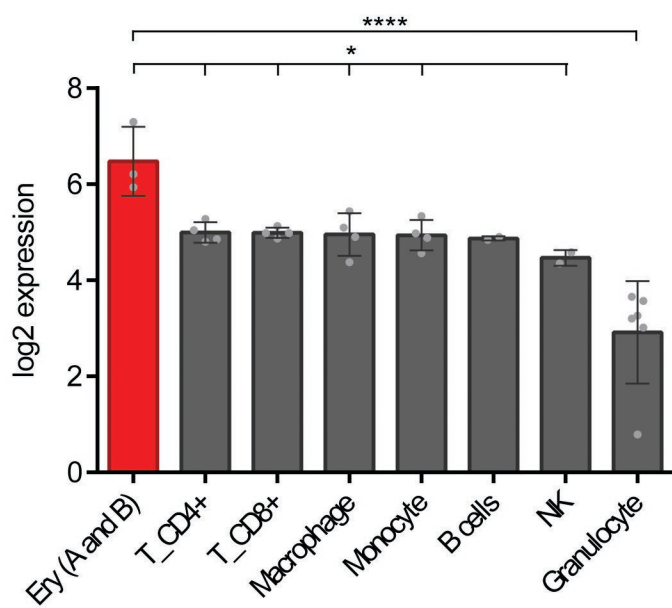

Human

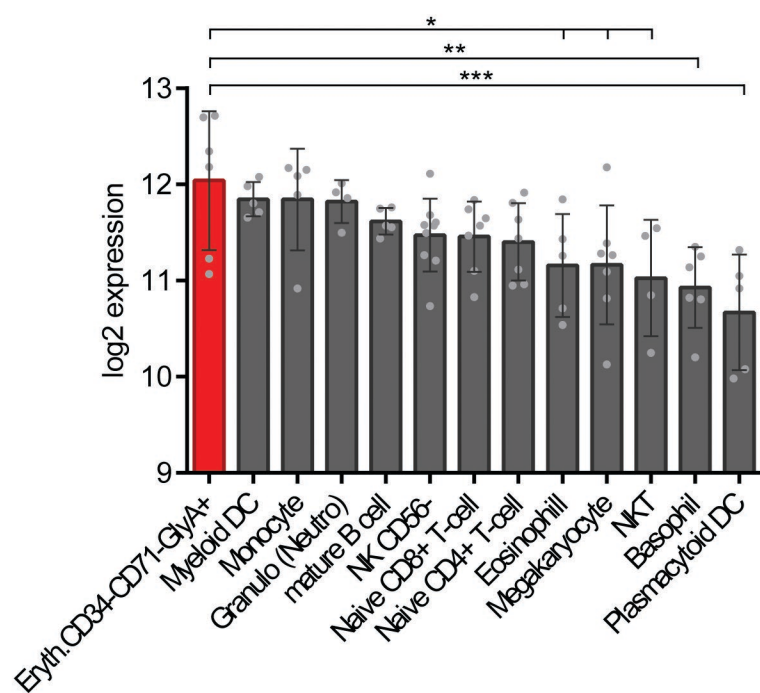

**A**

Suppl Figure 7

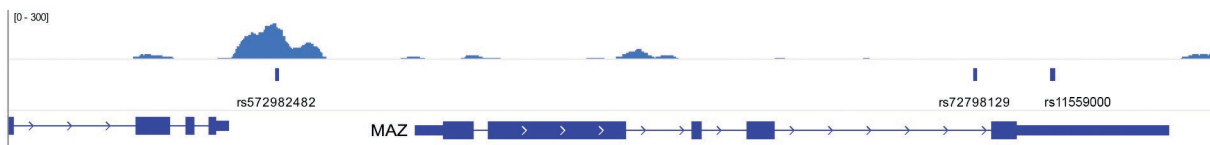**B**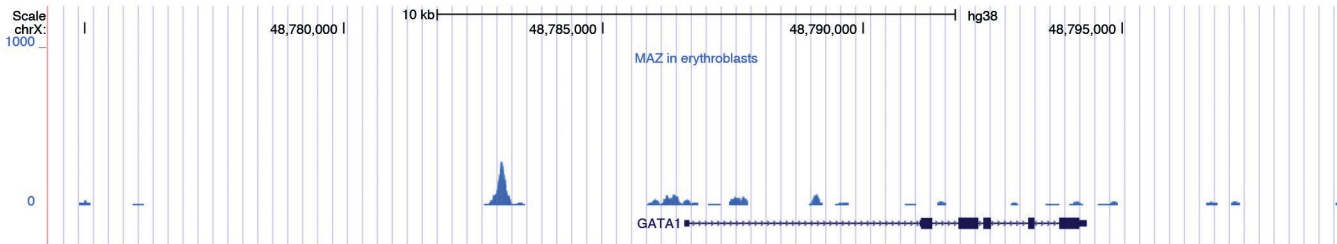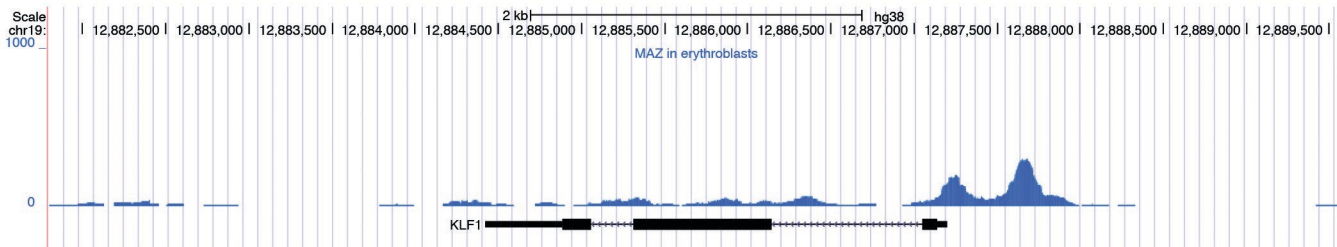

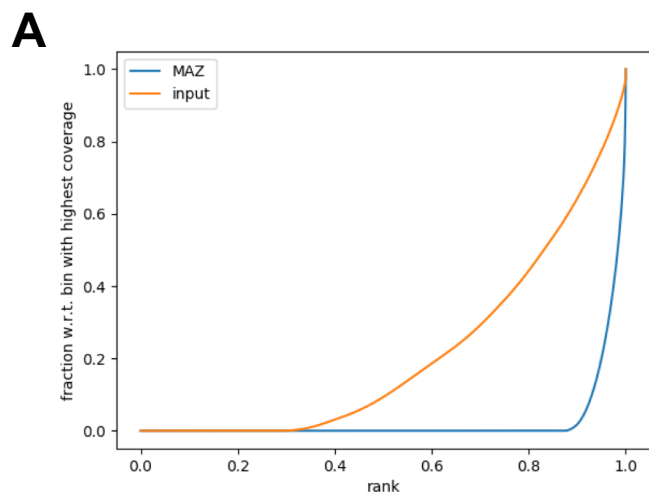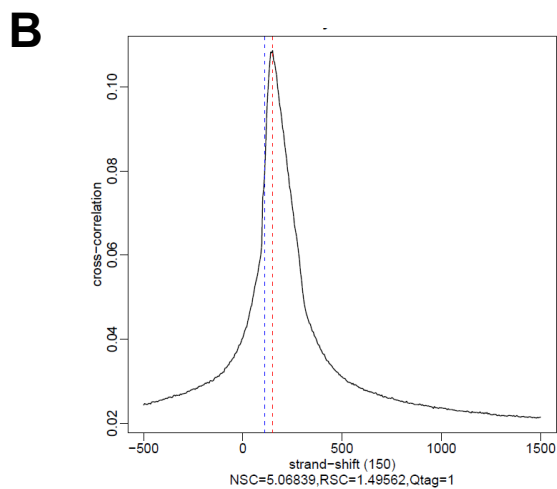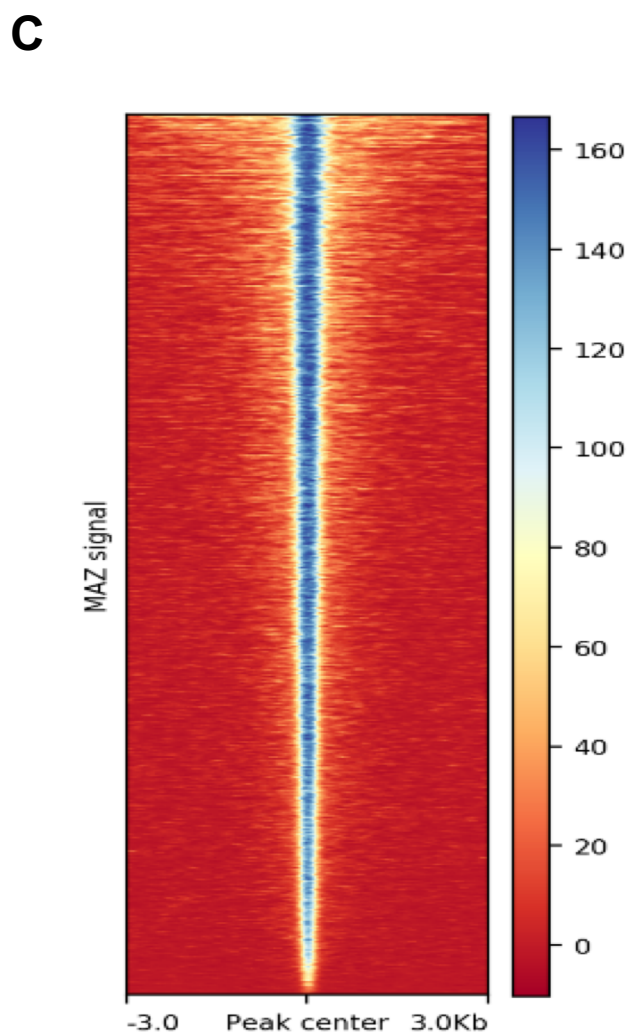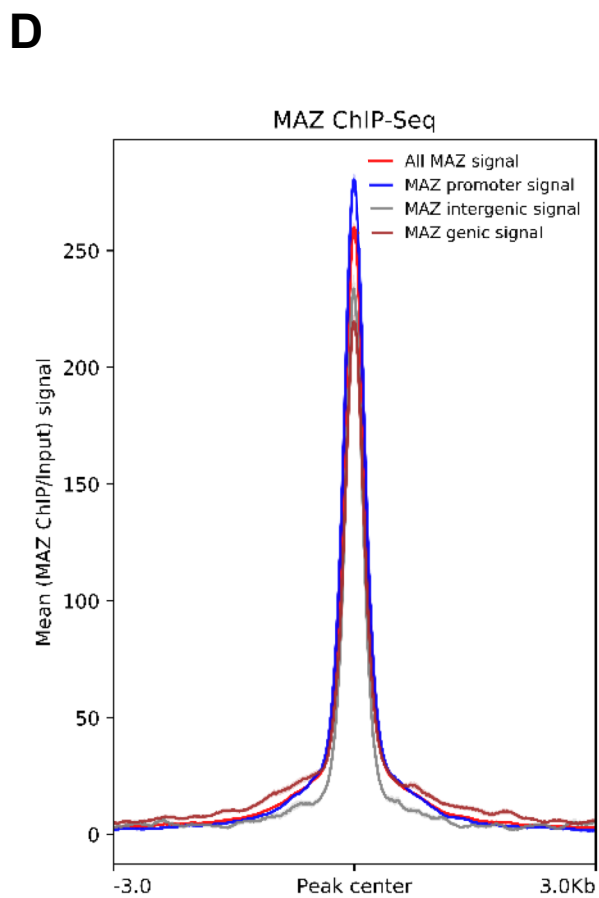



| Oligo        | Sequence                                 | Binding of MAZ           |
|--------------|------------------------------------------|--------------------------|
| 13/14 (WT) : | 5' AGT CCC <b>GGG CGG GGC</b> CTG        | +                        |
| 13/14 (M1) : | 5' <b>CAC ACC</b> <b>GGG CGG GGC</b> CTG | +                        |
| 13/14 (M2) : | 5' AGT CCC <b>GGG CGT ATA</b> CTG        | -                        |
| 13/14 (M3) : | 5' AGT CCC <b>GGG CTG GGC</b> CTG        | - (see also Sup. Fig.3B) |
| 13/14 (M4) : | 5' AGT CCC <b>GTG CGG GGC</b> CTG        | -                        |
| 11/12 (WT) : | 5' GC CCG <b>GGG CGC GGC</b> CTG         | <                        |

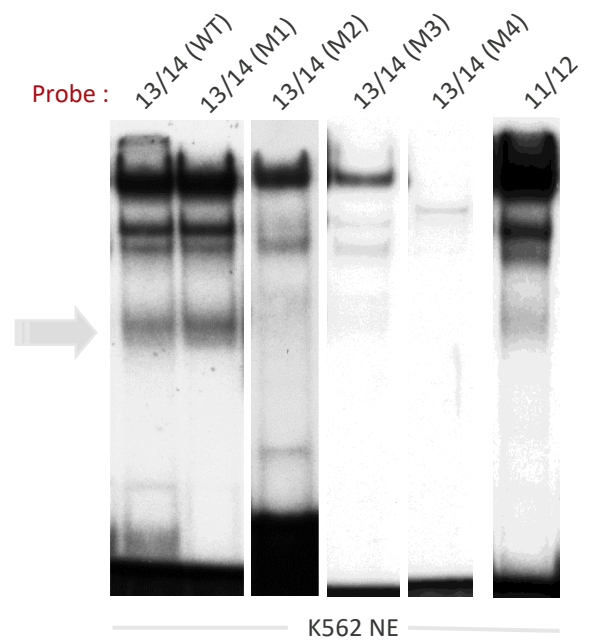

**A**

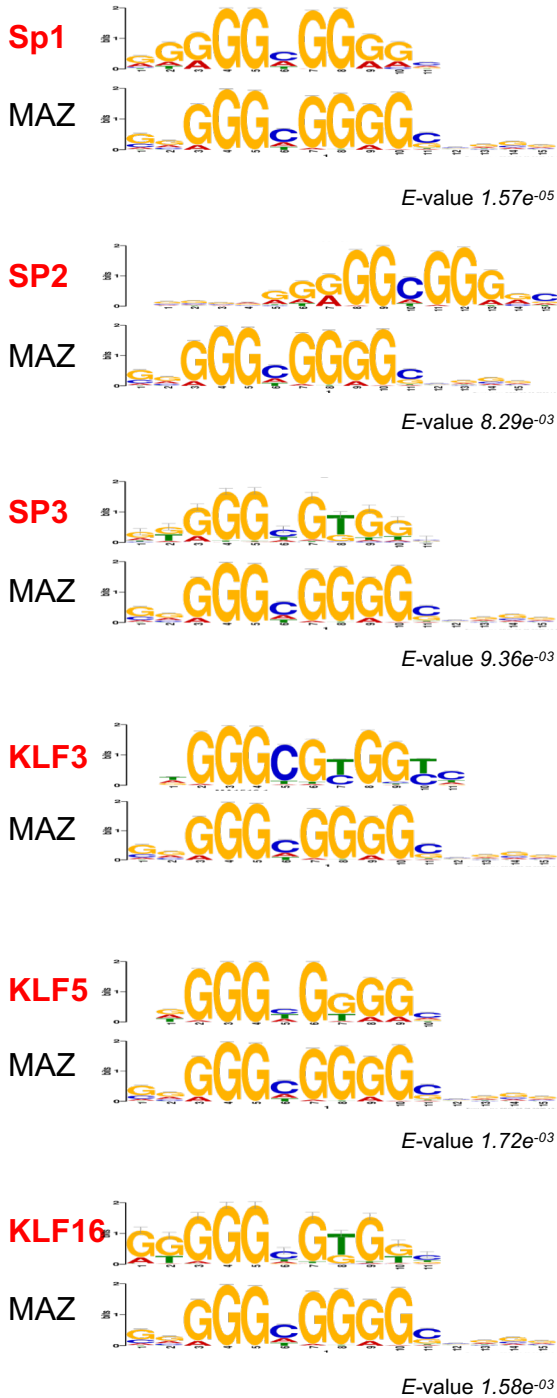

**B**

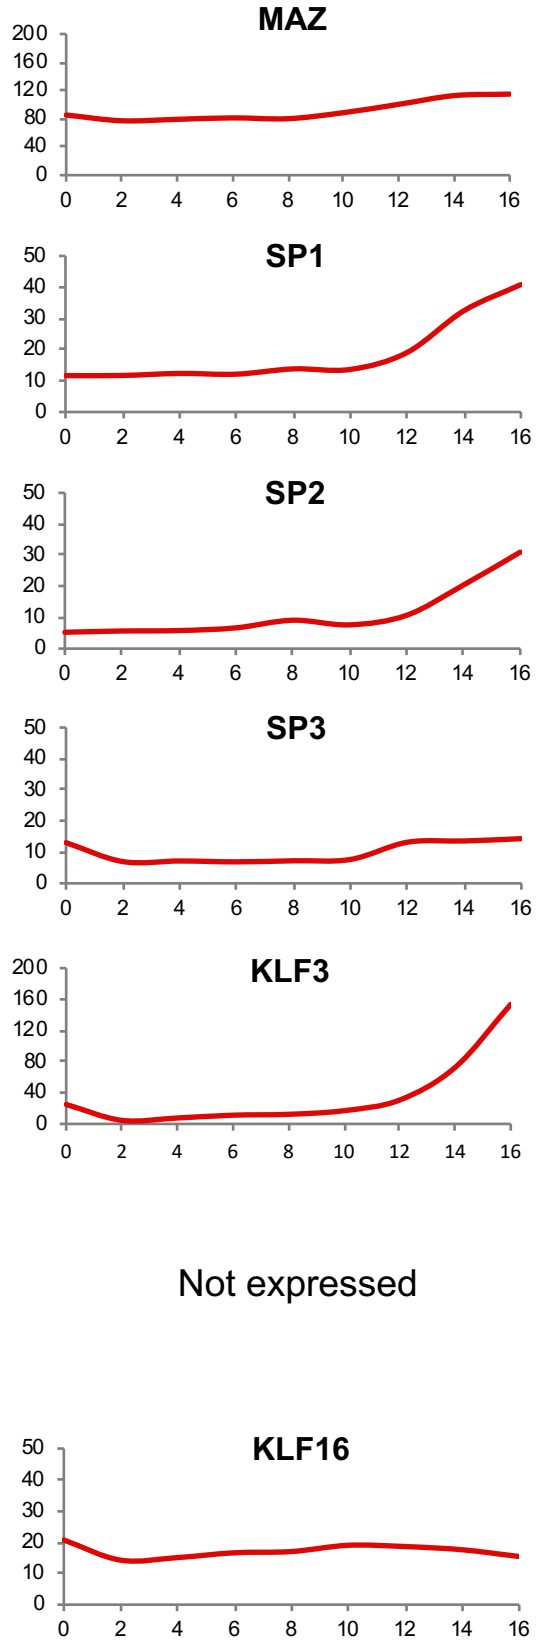

**C**

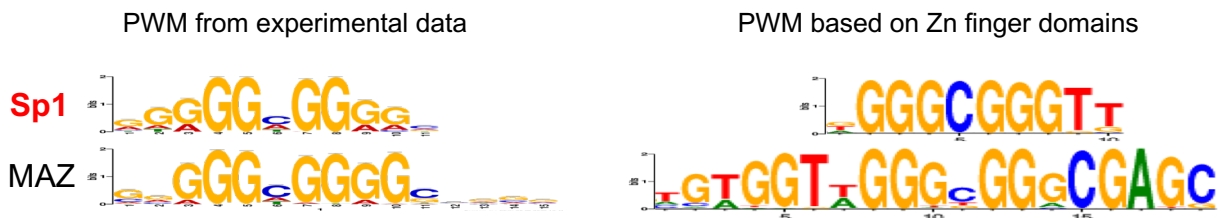

MAZ

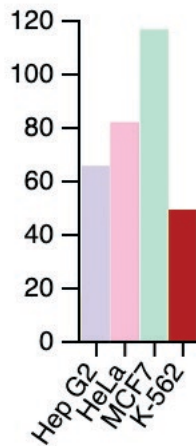

SP1

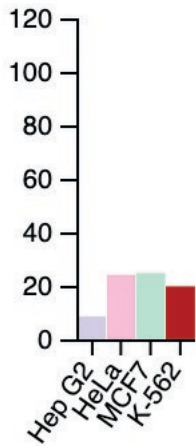

SP3

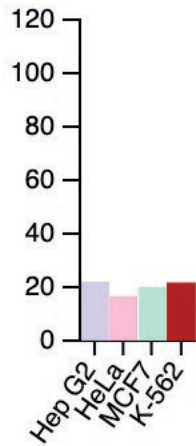

KLF3

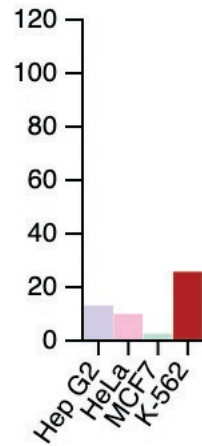

Suppl. Table 1. Results from mass spectrometry screen

MS/MS Counts  
 Enrichment  
 Significance Enrichment

The number of MS/MS spectra recorded for all peptides of the protein group  
 Calculated enrichment using the summed protein ion intensity  
 Statistical assessment of significance of enrichment

| Gene Names | Protein Names                                                              | Mol. Weight [kDa] | UniProt                                                    | Plfam                               | Plfam Descriptions                                                                          | ENSEMBL                         | Chrom | Strand | Position  | MS/MS Count (MULTI13/14) | MS/MS Count (MULTI13/14) | MS/MS Count wild-type replicate 1 | MS/MS Count wild-type replicate 2 | EnrichmentW T/MUT | Significance Enrichment |
|------------|----------------------------------------------------------------------------|-------------------|------------------------------------------------------------|-------------------------------------|---------------------------------------------------------------------------------------------|---------------------------------|-------|--------|-----------|--------------------------|--------------------------|-----------------------------------|-----------------------------------|-------------------|-------------------------|
| 1          | MA2                                                                        | 51.1              | B0122,QBNH7,P16270,Q5P9P,PF00094                           | PF00094                             | Zinc finger, C2H2 type                                                                      | ENSG00000103495                 | 16    | +      | 39732336  | 9                        | 1                        | 10                                | 14.3                              | 5.2E-06           |                         |
| 2          | HIST1H1E,H1F3                                                              | 22.4              | P16402                                                     | PF00538                             | linker histone H1 and H5 family                                                             | ENSG00000124575                 | 6     | -      | 26342175  | 3                        | 0                        | 1                                 | 3                                 | 10.9              | 1.7E-05                 |
| 3          | HIST1H1E,H1F4                                                              | 21.9              | P16401,A18077,A18078,Q4V24                                 | PF00538                             | linker histone H1 and H5 family                                                             | ENSG00000168298                 | 6     | +      | 26245466  | 2                        | 1                        | 1                                 | 3                                 | 9.2               | 1.1E-04                 |
| 4          | H1FX                                                                       | 22.5              | Q92522                                                     | PF00538                             | linker histone H1 and H5 family                                                             | ENSG00000184897                 | 3     | -      | 130516794 | 2                        | 3                        | 4                                 | 21                                | 9.0               | 1.8E-04                 |
| 5          | HS1L1,CATX11,CSIG,PKH1L12                                                  | 55.0              | P76021,ADP817,Q12Q62,ADP616                                | PF00094                             | Ribosomal L1 domain-containing protein 1, Cellular senescence inhibited gene protein, Prote | ENSG00000121490                 | 16    | -      | 11835554  | 1                        | 2                        | 5                                 | 18                                | 8.8               | 1.5E-04                 |
| 6          | EBNA1,BP2,EBP2                                                             | 34.9              | Q99448,Q9829                                               | PF05890                             | Eukaryotic RNA processing protein EBP2                                                      | ENSG00000117395                 | 1     | -      | 43402440  | 0                        | 1                        | 5                                 | 19                                | 8.6               | 1.8E-04                 |
| 7          | HIST1H1E,H1F5                                                              | 22.6              | P16401                                                     | PF00538                             | linker histone H1 and H5 family                                                             | ENSG00000184857                 | 6     | -      | 27982006  | 6                        | 5                        | 9                                 | 8                                 | 8.2               | 2.4E-04                 |
| 8          | HBM4A,KIAA1178,BP1                                                         | 46.9              | P43296,ARKK17_A3A2V0                                       | PF00076                             | RNA recognition motif (a.k.a. RRM, RBD, or RNP domain)                                      | ENSG00000188759                 | 1     | -      | 233361131 | 0                        | 4                        | 5                                 | 33                                | 2.8E-04           |                         |
| 9          | DHX36,DDX36,KIAA1488,MLE1,18HAU                                            | 114.8             | Q9ZU11                                                     | PF00270,PF07171,PF04408,PF00271     | DEAD/DEAF box helicase,Domain of unknown function                                           | ENSG00000174953                 | 3     | -      | 155476152 | 6                        | 6                        | 42                                | 55                                | 7.4               | 4.4E-04                 |
| 10         | DDX21                                                                      | 87.3              | Q9NR30,Q35WU7,Q9NR92                                       | PF00270,PF08152,PF00271             | DEAD/DEAF box helicase,GUIC (NUC153) domain,Helicase                                        | ENSG00000165732                 | 10    | +      | 70385898  | 2                        | 1                        | 16                                | 50                                | 7.3               | 4.8E-04                 |
| 11         | DDIF10.1                                                                   | 51.6              | D43328,Q1E039,Q5FWF3                                       | PF00094                             | Putative uncharacterized protein 101F10.1                                                   | ENSG00000103550                 | 16    | -      | 19625224  | 2                        | 8                        | 8                                 | 44                                | 6.3               | 1.1E-03                 |
| 12         | HLTF,HP116A,NF80,SMARCA3,SNF2L3,ZBTB11                                     | 113.9             | AK596,Q14527,Q05826,Q05072,PF00271,PF08797,PF00176,PF00097 | PF00271,PF08797,PF00176,PF00097     | Helicase conserved C-terminal domain,HRAN domain                                            | ENSG00000071794                 | 3     | -      | 150230594 | 0                        | 2                        | 17                                | 5.9                               | 0                 | 1.7E-03                 |
| 13         | HLTF,HLTF140                                                               | 126.3             | PF1251,ARK1E7,Q14756,AKM54                                 | PF00094,PF00531,PF08519             | ATPase family associated with various cellular activities                                   | ENSG00000159528                 | 4     | -      | 36862471  | 0                        | 2                        | 2                                 | 25                                | 5.8               | 1.8E-03                 |
| 14         | HIST1H1C,H1F2                                                              | 21.4              | P16403,AK842                                               | PF00538                             | linker histone H1 and H5 family                                                             | ENSG00000187827                 | 6     | -      | 26130394  | 4                        | 11                       | 13                                | 28                                | 5.6               | 2.2E-03                 |
| 15         | NOLA5,NF56,RP4-68EC3.1-01C,RP4-68EC3.1-01G                                 | 60.0              | D00547,ADP192,2,ARK96,Q98N53                               | PF01798,PF08151,PF08060             | Putative snRNA binding domain,NOP57 (NUC127)                                                | ENSG00000103161                 | 20    | +      | 2581178   | 0                        | 0                        | 0                                 | 20                                | 5.5               | 2.4E-03                 |
| 16         | RP517,LOC392101,CCG_1808625,tcag7_955                                      | 15.9              | AKMVC5,AKM177,P08708,AA01Q6                                | PF00833                             | Ribosomal S17                                                                               | ENSG00000197575,ENSG00000197576 | 5     | +      | 116079834 | 1                        | 0                        | 3                                 | 2                                 | 5.4               | 2.7E-03                 |
| 17         | NRFB7,NBAF,NRF                                                             | 77.7              | D15226,A121A7,A21827,A21828,A21829                         | PF00035,PF01585,PF01424             | Double-stranded RNA binding motif 6 patch domain,R                                          | ENSG00000108416                 | X     | -      | 118060328 | 2                        | 1                        | 26                                | 5.3                               | 2.9E-03           |                         |
| 18         | NBA28                                                                      | 85.7              | Q9NWX1,AA0100,Q53H65                                       | PF00076                             | RNA recognition motif                                                                       | ENSG00000106344                 | 7     | -      | 127737673 | 0                        | 1                        | 13                                | 5.2                               | 3.1E-03           |                         |
| 19         | RP131                                                                      | 14.5              | P12899,Q2FNK3,Q61R20,AKM913                                | PF01198                             | Ribosomal protein L31e                                                                      | ENSG00000071082                 | 2     | +      | 100885193 | 0                        | 3                        | 4                                 | 3                                 | 5.2               | 3.2E-03                 |
| 20         | RP3                                                                        | 81.9              | Q02447,Q59F95,Q68D97,Q80L70,Q80096                         | PF00096                             | Zinc finger, C2H2 type                                                                      | ENSG00000172845                 | 2     | -      | 174481505 | 0                        | 0                        | 2                                 | 2                                 | 4                 | 40V(D)                  |
| 21         | RBX1,NEP51,YB1                                                             | 35.9              | PC7809,ADJL14,Q05D43,Q5FV6,AK4                             | PF00313                             | Cold-shock/DNA-binding domain                                                               | ENSG00000065978                 | 1     | -      | 42920565  | 19                       | 26                       | 59                                | 56                                | 4.9               | 4.1E-03                 |
| 22         | RP1BP3,RP5-930A.3,001,CCG_38870,RP5-930A.3,005,RP5-930A.3,002,DKFZq3410161 | 61.4              | AKM71,ARK857,Q5N05,05515,0504                              | PF00538                             | linker histone H1 and H5 family                                                             | ENSG00000127483                 | 1     | +      | 20941758  | 1                        | 4                        | 15                                | 4.9                               | 4.2E-03           |                         |
| 23         | DNF512,KIAA1805,DKF26661156                                                | 64.6              | Q9M671,Q53R27,Q558M0,Q8KXK                                 | PF00096                             | Zinc finger, C2H2 type                                                                      | ENSG00000198522                 | 2     | +      | 27659397  | 0                        | 5                        | 6.8                               | 4.7                               | 5.4E-03           |                         |
| 24         | DNF579                                                                     | 60.5              | Q9NAP0                                                     | PF00096                             | Zinc finger, C2H2 type                                                                      | ENSG00000179943                 | 19    | -      | 60780705  | 1                        | 0                        | 1                                 | 1                                 | 4.6               | 5.6E-03                 |
| 25         | DNF646,CCG_1838A,KIAA0296                                                  | 200.8             | Q9V08,Q15015                                               | PF00096                             | Zinc finger, C2H2 type                                                                      | ENSG00000167395                 | 16    | +      | 30993263  | 0                        | 0                        | 7                                 | 4.5                               | 6.0E-03           |                         |
| 26         | ICP1                                                                       | 90.7              | P11397,ARK478,Q9AN05,Q6F9F5,PF01018,PF02716                | PF01018,PF02716                     | Eukaryotic DNA topoisomerase I, catalytic core,Subunit                                      | ENSG00000189000                 | 20    | +      | 39087076  | 64                       | 124                      | 114                               | 114                               | 4.5               | 6.5E-03                 |
| 27         | PFYAN1,SPTA2                                                               | 286.0             | AKM51,LAMN68,Q13813,Q9L61C,Q100035,PF08726,PF00018,PF00435 | PF00035,PF08726,PF00018,PF00435     | EF hand,CD2-invariant EF hand,S1 domain,Spectrin                                            | ENSG00000197604                 | 9     | +      | 13034400  | 0                        | 0                        | 1                                 | 3                                 | 4.1               | 9.2E-03                 |
| 28         | RP525                                                                      | 13.7              | PE2851,LA6N190,AKM42,AKM595                                | PF01297                             | S25 ribosomal protein                                                                       | ENSG00000118181                 | 11    | -      | 118931615 | 2                        | 1                        | 3                                 | 5                                 | 4.1               | 9.7E-03                 |
| 29         | TCOF1                                                                      | 155.9             | Q13428,Q59F22,Q9FUD4,ADJL10                                | PF03546                             | Trachea Collins syndrome protein,TCOF1 protein                                              | ENSG00000070814                 | 5     | +      | 149717428 | 0                        | 2                        | 4                                 | 18                                | 4.0               | 1.0E-02                 |
| 30         | RP1L1,RP11-223115.3,005,RP11-223115.3,004                                  | 20.3              | PC2913,Q08E58,Q5VDD0,Q5VCK8,Q5VCK9                         | PF00281,PF00673                     | Ribosomal protein L5,ribosomal L5P family C-terminu                                         | ENSG00000142676                 | 1     | +      | 2380881   | 1                        | 4                        | 1                                 | 2                                 | 4.0               | 1.1E-02                 |
| 31         | BDX2,BRX                                                                   | 41.4              | Q8TDM,ADJL05,AKM93,Q9MVA4                                  | PF04427                             | Brix domain                                                                                 | ENSG00000113460                 | 5     | +      | 34951238  | 1                        | 6                        | 16                                | 4.0                               | 1.1E-02           |                         |
| 32         | BDX11,KAM145                                                               | 208.7             | Q14905,Q17492,Q5W993,Q6F213                                | PF00575                             | S1 RNA binding domain                                                                       | ENSG00000148843                 | 10    | +      | 105146483 | 1                        | 2                        | 8                                 | 22                                | 3.8               | 2.4E-02                 |
| 33         | MMT42,C1orf15                                                              | 29.4              | Q9BL76                                                     | PF00096                             | Zinc finger, C2H2 type                                                                      | ENSG00000143793                 | 1     | -      | 236350502 | 0                        | 1                        | 1                                 | 3                                 | 3.6               | 1.4E-02                 |
| 34         | SP4K,CCG2,RP54,SCAR,SP4Y2,RP54Y2P                                          | 29.6              | PE2701,Q53HV1,Q9B1L1,Q8T47,AK4                             | PF00467,PF00900,PF08071,PF01479     | KOW motif,Ribosomal family S4e,RSANT (NUC203) dom                                           | ENSG00000198034,ENSG00000198035 | 4     | -      | 17488500  | 1                        | 1                        | 3                                 | 3.6                               | 1.7E-02           |                         |
| 35         | LYAR,PNAS-5                                                                | 43.6              | Q9NKS,AK83Y5                                               | PF08790                             | LYAR-type C2HC zinc finger                                                                  | ENSG00000145220                 | 4     | -      | 4320329   | 25                       | 25                       | 49                                | 83                                | 3.6               | 1.7E-02                 |
| 36         | CCDC137                                                                    | 33.2              | Q9PKD4                                                     | PF00096                             | Coiled coil domain-containing protein 137                                                   | ENSG00000185298                 | 17    | +      | 77244191  | 3                        | 7                        | 20                                | 3.5                               | 1.8E-02           |                         |
| 37         | SG202,HD38,HD-38                                                           | 39.2              | Q9H9L3                                                     | PF00929                             | Exonuclease                                                                                 | ENSG00000143319                 | 1     | -      | 154959019 | 0                        | 0                        | 5                                 | 10                                | 3.5               | 1.8E-02                 |
| 38         | RP181,AKA0179                                                              | 84.4              | Q1884,Q9F3M8                                               | PF05997                             | Nucleolar protein,Nop52                                                                     | ENSG00000150108                 | 21    | +      | 4383860   | 7                        | 6                        | 9                                 | 4.0                               | 2.1E-02           |                         |
| 39         | HA2                                                                        | 23.8              | Q95816                                                     | PF01179                             | BAG domain                                                                                  | ENSG00000112208                 | 6     | +      | 57450583  | 0                        | 1                        | 1                                 | 3.4                               | 2.3E-02           |                         |
| 40         | PURB                                                                       | 33.2              | Q9608,ADZ17                                                | PF04845                             | PurA tRNA and RNA binding protein                                                           | ENSG00000146676                 | 7     | -      | 44889509  | 3                        | 5                        | 5                                 | 9                                 | 3.4               | 2.2E-02                 |
| 41         | ZBTB48,HKX3,RP11-58A11.4,004,RP11-58A11.4,005                              | 77.1              | P10074,AKM291,Q6LCP1,Q5SV20,Q5SV21                         | PF00661,PF00096                     | BTB/P0Z domain,Zinc finger, C2H2 type                                                       | ENSG00000204859                 | 1     | +      | 6562098   | 0                        | 1                        | 3                                 | 3.4                               | 2.2E-02           |                         |
| 42         | MCP2                                                                       | 53.3              | PS1608,AK879,AKM795                                        | PF02178,PF01429                     | AT hook motif,Methyl-CpG binding domain                                                     | ENSG00000169057                 | X     | -      | 152940218 | 5                        | 15                       | 22                                | 3.3                               | 2.3E-02           |                         |
| 43         | HBMK,HNPG,8BMX1,CCB1,DKFZq547N117,8BMX1,RP4-531M19.2,001,PCG_233A1         | 42.3              | PS18159,Q9BNY7,Q5VNA3,Q9AC93,Q9                            | PF08081,PF00076                     | RBM17C (NUC264) family,RNA recognition motif (a.k.a                                         | ENSG00000147274,ENSG00000147275 | X     | -      | 135783288 | 0                        | 1                        | 1                                 | 3.3                               | 2.3E-02           |                         |
| 44         | WNA,RECQ2,RECQ2.2                                                          | 162.5             | Q34139,ALX1Y9,Q59F99                                       | PF01612,PF00270,PF00271,PF00570     | 3'-5' exonuclease,DEAD/DEAF box helicase,Helicase con                                       | ENSG00000165392                 | 8     | +      | 31010320  | 6                        | 2                        | 15                                | 16                                | 3.3               | 2.4E-02                 |
| 45         | CDNA-39A                                                                   | 40.1              | P16090,Q5985                                               | PF00313                             | Cold-shock/DNA-binding domain                                                               | ENSG00000060138                 | 12    | -      | 10742956  | 1                        | 7                        | 7                                 | 0                                 | 3.1               | 3.0E-02                 |
| 46         | HLF1F,ENF1U,CEN2A,XLIP1,PRP1                                               | 47.5              | Q71F23,A218D9,ASD8K7,ARK802,Q05N1,Q09K42                   | PF00687                             | Ribosomal protein L1p(L1)10e family                                                         | ENSG00000198755                 | 6     | +      | 35544156  | 10                       | 4                        | 3                                 | 5                                 | 3.0               | 3.5E-02                 |
| 47         | RP1L0A,NEED6                                                               | 25.0              | PE2906,Q1Q276,AKNGU2                                       | PF00687                             | Ribosomal protein L1p(L1)10e family                                                         | ENSG00000198755                 | 6     | +      | 35544156  | 10                       | 4                        | 3                                 | 5                                 | 3.0               | 3.5E-02                 |
| 48         | DNCS59,8R22,TAP26,HPIC128                                                  | 28.7              | Q9P031                                                     | PF00096                             | Thyroid transcription factor 1-associated protein 26,TF1-1-associ                           | ENSG00000133773                 | 12    | -      | 81270761  | 1                        | 1                        | 1                                 | 2                                 | 3.0               | 3.5E-02                 |
| 49         | UBTF,UBF,UBF1                                                              | 154.0             | P17480,ARK68R,ARK962,Q05821,Q05822                         | PF00505                             | HMG (High mobility group) box                                                               | ENSG00000108312                 | 17    | -      | 39637928  | 1                        | 2                        | 11                                | 3.0                               | 3.6E-02           |                         |
| 50         | HLAR,RECQ2,RECQ3                                                           | 159.0             | P54132,Q38770                                              | PF08072,PF00270,PF00271,PF00570     | SDHC (NUC31) domain,DEAD/DEAF box helicase,Helicase                                         | ENSG00000197299                 | 15    | +      | 89061583  | 12                       | 2                        | 12                                | 2.9                               | 4.1E-02           |                         |
| 51         | PF3A1,HP1,CCG_312399                                                       | 29.9              | PE1247,AKM106,Q9N180,AKM2C3                                | PF01051                             | Ribosomal S10a family                                                                       | ENSG00000145425,ENSG00000145426 | 4     | +      | 152340294 | 6                        | 7                        | 5                                 | 6                                 | 2.8               | 4.2E-02                 |
| 52         | HP8F,ADPMT,PCOL                                                            | 113.1             | PH8874,Q05D33,Q5V986,Q6FLD10                               | PF00513,PF08063,PF00644,PF02877,PF0 | BRCA1 C-Terminal,BRCT1 domain,PAD21 (NUC208) dom                                            | ENSG00000143789                 | 1     | -      | 234611014 | 123                      | 119                      | 200                               | 304                               | 2.8               | 4.2E-02                 |
| 53         | DDX18                                                                      | 75.4              | Q9N9V1,Q4272,Q5T386,PF00154                                | PF00270,PF00271                     | DEAD/DEAF box helicase,Helicase conserved C-terminal                                        | ENSG00000082025                 | 2     | +      | 118288725 | 13                       | 16                       | 27                                | 2.7                               | 4.7E-02           |                         |

**Table S2.** Erythroid-related traits used to search for MAZ variants in the GeneAtlas database

| <b>ID of the trait</b>   | <b>Description of the trait</b>                          | <b>Category</b> |
|--------------------------|----------------------------------------------------------|-----------------|
| selfReported_n_1504      | anaemia                                                  | Binary          |
| clinical_c_D50           | D50 Iron deficiency anaemia                              | Binary          |
| clinical_c_Block_D50-D53 | D50-D53 Nutritional anaemias                             | Binary          |
| clinical_c_D51           | D51 Vitamin B12 deficiency anaemia                       | Binary          |
| clinical_c_Block_D60-D64 | D60-D64 Aplastic and other anaemias                      | Binary          |
| clinical_c_D63           | D63 Anaemia in chronic diseases classified elsewhere     | Binary          |
| clinical_c_D64           | D64 Other anaemias                                       | Binary          |
| clinical_c_Block_D70-D77 | D70-D77 Other diseases of blood and blood-forming organs | Binary          |
| clinical_c_D75           | D75 Other diseases of blood and blood-forming organs     | Binary          |
| 30030-0.0                | Haematocrit percentage                                   | Non-Binary      |
| selfReported_n_1502      | haematology                                              | Binary          |
| 30020-0.0                | Haemoglobin concentration                                | Non-Binary      |
| 30300-0.0                | High light scatter reticulocyte count                    | Non-Binary      |
| 30290-0.0                | High light scatter reticulocyte percentage               | Non-Binary      |
| 30280-0.0                | Immature reticulocyte fraction                           | Non-Binary      |
| 30050-0.0                | Mean corpuscular haemoglobin                             | Non-Binary      |
| 30060-0.0                | Mean corpuscular haemoglobin concentration               | Non-Binary      |
| 30260-0.0                | Mean reticulocyte volume                                 | Non-Binary      |
| 30270-0.0                | Mean spheroid cell volume                                | Non-Binary      |

|           |                                                 |            |
|-----------|-------------------------------------------------|------------|
| 30170-0.0 | Nucleated red blood cell count                  | Non-Binary |
| 30230-0.0 | Nucleated red blood cell percentage             | Non-Binary |
| 30010-0.0 | Red blood cell (erythrocyte) count              | Non-Binary |
| 30070-0.0 | Red blood cell (erythrocyte) distribution width | Non-Binary |
| 30250-0.0 | Reticulocyte count                              | Non-Binary |
| 30240-0.0 | Reticulocyte percentage                         | Non-Binary |

**SupplementalTable 3: Datasets used in the study**

| Cell type                                   | Data set | Crosslinking/<br>Reference | Mapped reads | GEO accession |
|---------------------------------------------|----------|----------------------------|--------------|---------------|
| Erythroblasts                               | MAZ      | EGS + CH <sub>2</sub> O    | 12 058 863   | GSE139281     |
| Erythroblasts,<br>default input data<br>set | Input 1  | 8                          | 13 158 630   | GSE114084     |
| Erythroblasts                               | ATAC-Seq | 17                         | 70 014 192   | GSE74912      |
| Erythroblasts                               | H3K4me3  | 18                         | 5 349 306    | GSE36985      |
| Erythroblasts                               | H3K27ac  | 19                         | 56 439 919   | GSE70660      |
| Erythroblasts                               | Pol2     | 18                         | 97 237 763   | GSE36985      |
| Erythroblasts                               | H3K27me3 | 18                         | 4 990 983    | GSE36985      |
| Erythroblasts                               | H3K4me1  | 19                         | 27 531 447   | GSE70660      |
| Erythroblasts                               | GATA1    | 19                         | 118 938 490  | GSE36985      |
| Erythroblasts                               | CTCF     | 20                         | 59 309 750   | GSE102184     |
| HepG2<br>(hepatocellular<br>carcinoma)      | MAZ      | 21                         | 51 465 720   | GSE31477      |
| A549<br>(lung carcinoma)                    | MAZ      | 21                         | 39 848 427   | GSE91939      |
| GM12878<br>(B lymphoblastoid)               | MAZ      | 21                         | 40 269 745   | GSE106046     |
| MCF-7<br>(mammary<br>adenocarcinoma)        | MAZ      | 21                         | 128 288 726  | GSE91633      |
| IMR90<br>(fetal lung<br>fibroblast)         | MAZ      | 21                         | 34 117 266   | GSE31477      |

**Suppl Table 4. Tissue specific MAZ peaks in ENCODE human cell lines and human primary erythroid cells.**

| <b>Cell line</b> | <b>Unique peaks</b> | <b>Total number of peaks</b> | <b>% unique peaks</b> |
|------------------|---------------------|------------------------------|-----------------------|
| HepG2            | 3636                | 15481                        | 23.5%                 |
| Gm12878          | 9480                | 23951                        | 39.6%                 |
| A549             | 335                 | 4323                         | 7.7%                  |
| MCF-7            | 6512                | 20419                        | 31.9%                 |
| IMR90            | 11383               | 28208                        | 40.4%                 |
| Ery              | 1780                | 10088                        | 17.6%                 |



**Supplemental Table 5. Genomic loci associated with erythroid traits and erythropoiesis which are bound by MAZ**

| <b>Genomic locus</b> | <b>Erythroid traits</b>  | <b>Location of the MAZ peak</b>                         | <b>Position of the MAZ peak</b> | <b>Fold change relative to the input</b> | <b>log<sub>10</sub> q-value of the MAZ peak</b> |
|----------------------|--------------------------|---------------------------------------------------------|---------------------------------|------------------------------------------|-------------------------------------------------|
| ITFG3(FAM234A)       | Hb, MCH, MCHC, MCV, RBC  | ITFG3 promoter                                          | chr16:234379-235136             | 36.8                                     | 81.46                                           |
| HBS1L-MYB            | Hct, MCH, MCHC, MCV, RBC | HBSL1 promoter, MYB first intron                        | chr6:135054682-135055128        | 26.95                                    | 57.41                                           |
|                      |                          |                                                         | chr6:135183043-135183281        | 7.15                                     | 8.84                                            |
| G6PD                 | Hct, Hb, MCV, RBC, RDW   | G6PD promoter, G6PD second intron                       | chrX:154547246-154547697        | 13.49                                    | 21.39                                           |
|                      |                          |                                                         | chrX:154541913-154542409        | 16.38                                    | 29.99                                           |
| CCND3                | MCH, MCV, RBC            | CCND3 promoter, CCND3 first intron, CCND3 second intron | chr6:42045709-42046059          | 20.64                                    | 38.02                                           |
|                      |                          |                                                         | chr6:42030970-42031193          | 9.47                                     | 12.15                                           |
|                      |                          |                                                         | chr6:42017103-42017413          | 18.51                                    | 32.58                                           |
|                      |                          |                                                         | chr6:41941500-41942068          | 35.9                                     | 78.1                                            |
|                      |                          |                                                         | chr6:41938239-41938465          | 6.48                                     | 6.64                                            |
| TFR2                 | Hct, MCV, RBC            | TFR2 promoter                                           | chr7:100641422-100642132        | 78.49                                    | 205.83                                          |
| TFRC                 | MCH, MCV                 | TFRC promoter                                           | chr8:20197105-20197542          | 13.49                                    | 21.39                                           |
| PDGFRA-KIT           | MCV, RBC                 | KIT promoter                                            | chr4:54657841-54658018          | 6.68                                     | 7.18                                            |
| CITED2               | MCH, MCV                 | CITED2 promoter                                         | chr6:139374652-139374972        | 6.16                                     | 5.72                                            |
|                      |                          |                                                         | chr6:139375180-139375707        | 8.01                                     | 9.22                                            |
| HMOX2                | MCH, MCV                 | HMOX2 promoter                                          | chr16:4476227-4476485           | 9.47                                     | 12.15                                           |

|                |              |                      |                           |       |       |
|----------------|--------------|----------------------|---------------------------|-------|-------|
| PRKCE          | Hct          | PRKCE first intron,  | chr2:45650249-45650426    | 6.01  | 6.17  |
|                |              | PRKCE second intron  | chr2:45778683-45778969    | 6.55  | 6.46  |
| CD164          | MCH          | CD164 promoter       | chr6:109381892-109382875  | 7.91  | 9.22  |
| SH2B3          | Hb           | SH2B3 promoter,      | chr12:111405191-111405978 | 13.18 | 21.95 |
|                |              | SH2B3 first intron,  | chr12:111406092-111406300 | 8.68  | 10.7  |
|                |              | SH2B3 second intron, | chr12:111406596-111406773 | 7.91  | 9.22  |
|                |              | SH2B3 third intron   | chr12:111429666-111429889 | 6.17  | 5.88  |
|                |              |                      | chr12:111437838-111438136 | 6.55  | 6.46  |
| CDT1           | MCHC         | CDT1 promoter        | chr16:88803519-88804082   | 22.76 | 43.54 |
| FBXO7          | MCV, MCH     | FBXO7 promoter       | chr22:32474726-32475349   | 6.33  | 6.25  |
| RPS19          | Hb, RBC, MCV | RPS19 promoter       | chr19:41859549-41860329   | 10.86 | 18.19 |
| EPOR           | RBC, Hb      | EPOR promoter,       | chr19:11384246-11384607   | 21.92 | 41.42 |
|                |              | EPOR first intron    | chr19:11383132-11383772   | 19.35 | 35.01 |
| KLF1           | MCH          | KLF1 promoter, KLF1  | chr19:12887097-12887963   | 17.2  | 29.7  |
|                |              | first intron, KLF1   | chr19:12886160-12886497   | 14.2  | 22.61 |
|                |              | second intron        | chr19:12885126-12885353   | 6.01  | 5.55  |
| GATA1          | RBC          | GATA1 promoter       | chrX:48786184-48786580    | 11.57 | 16.63 |
| SBDS           | Hb           | SBDS promoter        | chr7:66995478-66995773    | 12.9  | 19.59 |
| CDAN1          | Hb           | CDAN1 promoter       | chr15:42736973-42737392   | 14.33 | 23.29 |
| PTPLAD1(HACD3) | MCH          | PTPLAD1 promoter     | chr15:65530326-65530535   | 7.7   | 8.62  |

**Table S6 Sequences of oligonucleotides used in this study**

| <b>EMSA Probe</b>  | <b>Sequence</b>                                            |
|--------------------|------------------------------------------------------------|
| 1/2                | CCCAAGCATAAACCCCTGG                                        |
| 3/4                | GGCCGGGCGTGCCCCCGC                                         |
| 5/6                | GAGCGCCGCCCGGCCGGG                                         |
| 7/8                | CGCCAGCCAATGAGCGCC                                         |
| 9/10               | CCGGGCTCCGCGCCAGC                                          |
| 11/12              | CCAGGCCGCGCCCCGGGC                                         |
| 13/14              | CAGGCCCCGCCCGGGACT                                         |
| <b>PCR Primers</b> | <b>Sequence</b>                                            |
| HBA Fw             | GAGGCCCTGGAGAGGATGTTCC                                     |
| HBA Rev            | ACAGCGCGTTGGGCATGTCGTC                                     |
| HBB Fw             | GCTCACCTGGACAACCTCA                                        |
| HBB Rev            | CGTTGCCCAGGAGCCTGAA                                        |
| HBE1 Fw            | GGGCAGACTCCTCGTTGTT                                        |
| HBE1 Rev           | GCCTTGACCTTGGGGTTG                                         |
| HBG Fw             | TGGGTCATTTACAGAGGAG                                        |
| HBG Rev            | TAGACAACCAGGAGCCTTCC                                       |
| MAZ Fw             | TGTGAGAAATGTGAGGCAGC                                       |
| MAZ Rev            | GCCGAGCTCAGCATCTTG                                         |
| PABPC1 Fw          | AGCTGTTCCCAACCCTGTAATC                                     |
| PABPC1 Rev         | GGATAGTATGCAGCACGGTTCTG                                    |
| <b>shRNAs</b>      | <b>Sequence</b>                                            |
| TRCN0000235699     | CCGGGATGCTGAGCTCGGCTTATATCTCGAGATATAAGCCGAGCTCAGCATCTTTTTG |
| TRCN0000235703     | CCGGTCTGTGAGCTCTGCAACAAAGCTCGAGCTTTGTTGCAGAGCTCACAGATTTTTG |
